# Supplementary material for: Cell subtypes and immune dysfunction in peritoneal fluid of endometriosis revealed by single-cell RNA-sequencing
Source: Cell Biosci. 2021 May 26;11:98. doi: 10.1186/s13578-021-00613-5 (PMC8157653; doi:10.1186/s13578-021-00613-5)
Supplement: Supplementary file 5 — Additional file 5: Table S4. List of markers information for each cluster in ascites cells. [file 13578_2021_613_MOESM5_ESM.xlsx]

## Sheet: Table S4
Table S4. List of markers information for each cluster in ascites cells
Gene name	p-val	p-val-adj	avg-logFC	pct.1	pct.2	Cluster	Cell type
FN1	0	0	1.6637	0.962	0.411	0	Macrophage 1
C1QB	0	0	1.38797	0.926	0.423	0	Macrophage 1
C1QA	0	0	1.38226	0.957	0.472	0	Macrophage 1
LYVE1	0	0	1.28926	0.949	0.334	0	Macrophage 1
MARCO	0	0	1.25455	0.994	0.497	0	Macrophage 1
S100A8	0	0	1.167	0.98	0.503	0	Macrophage 1
C1QC	0	0	1.14803	0.916	0.329	0	Macrophage 1
RNASE1	0	0	1.13838	0.983	0.421	0	Macrophage 1
CFD	0	0	1.12149	0.971	0.507	0	Macrophage 1
CD163	0	0	1.11463	0.995	0.526	0	Macrophage 1
CTSL	0	0	1.05459	0.998	0.586	0	Macrophage 1
PSAP	0	0	1.03238	1	0.792	0	Macrophage 1
FCGR3A	0	0	0.960463	0.999	0.573	0	Macrophage 1
CYP27A1	0	0	0.893459	0.774	0.176	0	Macrophage 1
LTA4H	0	0	0.880454	0.962	0.579	0	Macrophage 1
S100A9	0	0	0.860172	0.999	0.645	0	Macrophage 1
FTL	0	0	0.85128	1	0.998	0	Macrophage 1
CD14	0	0	0.850779	0.993	0.576	0	Macrophage 1
GLUL	0	0	0.841714	0.997	0.627	0	Macrophage 1
CYBB	0	0	0.824129	0.998	0.683	0	Macrophage 1
CTSB	0	0	0.820285	1	0.722	0	Macrophage 1
CYP1B1	0	0	0.795755	0.725	0.21	0	Macrophage 1
FTH1	0	0	0.79119	1	0.991	0	Macrophage 1
DRAM1	0	0	0.770993	0.941	0.41	0	Macrophage 1
MAF	0	0	0.767454	0.974	0.503	0	Macrophage 1
C2	0	0	0.766926	0.717	0.165	0	Macrophage 1
FOLR2	0	0	0.762944	0.879	0.305	0	Macrophage 1
CD68	0	0	0.760192	0.993	0.639	0	Macrophage 1
LIPA	0	0	0.75698	0.979	0.595	0	Macrophage 1
VSIG4	0	0	0.754599	0.974	0.599	0	Macrophage 1
CTSS	0	0	0.744092	1	0.8	0	Macrophage 1
SDC3	0	0	0.71787	0.808	0.236	0	Macrophage 1
MAFB	0	0	0.716585	0.994	0.567	0	Macrophage 1
CEBPB	0	0	0.709573	0.993	0.722	0	Macrophage 1
ALDH1A1	0	0	0.702549	0.733	0.183	0	Macrophage 1
GRN	0	0	0.700859	0.996	0.698	0	Macrophage 1
CREG1	0	0	0.664763	0.938	0.458	0	Macrophage 1
FCGRT	0	0	0.664403	0.994	0.705	0	Macrophage 1
CCR1	0	0	0.663723	0.967	0.575	0	Macrophage 1
MS4A7	0	0	0.658264	0.979	0.593	0	Macrophage 1
DST	0	0	0.657166	0.865	0.427	0	Macrophage 1
SIGLEC1	0	0	0.651997	0.888	0.321	0	Macrophage 1
BMP2K	0	0	0.639686	0.936	0.502	0	Macrophage 1
MS4A4A	0	0	0.637171	0.887	0.423	0	Macrophage 1
NPL	0	0	0.630054	0.912	0.369	0	Macrophage 1
LYPD2	0	0	0.627409	0.3	0.034	0	Macrophage 1
ACSL1	0	0	0.627071	0.805	0.345	0	Macrophage 1
DAB2	0	0	0.625715	0.977	0.515	0	Macrophage 1
VAMP5	0	0	0.624735	0.964	0.68	0	Macrophage 1
BRI3	0	0	0.617163	0.996	0.777	0	Macrophage 1
C5AR1	0	0	0.615924	0.941	0.425	0	Macrophage 1
LINC01094	0	0	0.611461	0.709	0.224	0	Macrophage 1
MARCKS	0	0	0.608868	0.996	0.692	0	Macrophage 1
ABCA1	0	0	0.605045	0.69	0.213	0	Macrophage 1
ITGAM	0	0	0.602264	0.967	0.595	0	Macrophage 1
SLC11A1	0	0	0.601833	0.873	0.366	0	Macrophage 1
TGM2	0	0	0.597476	0.686	0.246	0	Macrophage 1
TBC1D1	0	0	0.587438	0.9	0.506	0	Macrophage 1
SCARB2	0	0	0.586908	0.93	0.454	0	Macrophage 1
PRDX1	0	0	0.585092	0.992	0.783	0	Macrophage 1
HMOX1	0	0	0.577661	0.958	0.541	0	Macrophage 1
CTSD	0	0	0.574444	0.977	0.61	0	Macrophage 1
SDCBP	0	0	0.57443	0.994	0.729	0	Macrophage 1
ASAH1	0	0	0.572381	0.924	0.523	0	Macrophage 1
C3AR1	0	0	0.567964	0.946	0.537	0	Macrophage 1
DMXL2	0	0	0.553351	0.907	0.394	0	Macrophage 1
EMP1	0	0	0.552428	0.732	0.3	0	Macrophage 1
FMNL2	0	0	0.549671	0.809	0.329	0	Macrophage 1
SEPP1	0	0	0.548821	0.523	0.129	0	Macrophage 1
LRP1	0	0	0.547197	0.946	0.536	0	Macrophage 1
RBM47	0	0	0.546134	0.931	0.531	0	Macrophage 1
LGMN	0	0	0.545483	0.851	0.357	0	Macrophage 1
LILRB5	0	0	0.543146	0.661	0.196	0	Macrophage 1
CECR1	0	0	0.53758	0.929	0.581	0	Macrophage 1
CTSZ	0	0	0.53736	0.998	0.734	0	Macrophage 1
AIF1	0	0	0.5371	0.999	0.752	0	Macrophage 1
IFIT3	0	0	0.534914	0.663	0.272	0	Macrophage 1
PRNP	0	0	0.532474	0.889	0.448	0	Macrophage 1
ZFP36L1	0	0	0.530581	0.999	0.845	0	Macrophage 1
EHD4	0	0	0.526674	0.908	0.497	0	Macrophage 1
RNASE2	0	0	0.526651	0.608	0.181	0	Macrophage 1
LAMP1	0	0	0.520193	0.928	0.513	0	Macrophage 1
LINC01272	0	0	0.518941	0.858	0.384	0	Macrophage 1
GNS	0	0	0.518676	0.896	0.465	0	Macrophage 1
DOCK5	0	0	0.517881	0.771	0.363	0	Macrophage 1
FPR3	0	0	0.516224	0.932	0.549	0	Macrophage 1
ACP2	0	0	0.51237	0.75	0.245	0	Macrophage 1
TSPAN4	0	0	0.510332	0.782	0.319	0	Macrophage 1
TNFAIP2	0	0	0.509086	0.766	0.347	0	Macrophage 1
EMP3	0	0	0.509053	1	0.923	0	Macrophage 1
MSR1	0	0	0.50787	0.957	0.559	0	Macrophage 1
PYGL	0	0	0.507566	0.749	0.312	0	Macrophage 1
PDK4	0	0	0.507468	0.893	0.535	0	Macrophage 1
CMKLR1	0	0	0.50352	0.737	0.242	0	Macrophage 1
BLVRB	0	0	0.501927	0.965	0.634	0	Macrophage 1
TNFRSF1B	0	0	0.499858	0.926	0.57	0	Macrophage 1
CLIC4	0	0	0.498999	0.691	0.253	0	Macrophage 1
LYN	0	0	0.497903	0.97	0.645	0	Macrophage 1
TPP1	0	0	0.496513	0.97	0.653	0	Macrophage 1
NEAT1	0	0	0.493948	0.998	0.919	0	Macrophage 1
GPNMB	0	0	0.493166	0.748	0.253	0	Macrophage 1
SLC7A7	0	0	0.492018	0.834	0.395	0	Macrophage 1
ADAP2	0	0	0.491393	0.965	0.569	0	Macrophage 1
LAPTM5	0	0	0.485261	0.997	0.846	0	Macrophage 1
COLEC12	0	0	0.484771	0.617	0.228	0	Macrophage 1
RAB10	0	0	0.482296	0.965	0.647	0	Macrophage 1
APLP2	0	0	0.475622	0.989	0.719	0	Macrophage 1
MGAT1	0	0	0.475253	0.923	0.563	0	Macrophage 1
CHST15	0	0	0.474429	0.76	0.309	0	Macrophage 1
SAMD4A	0	0	0.473403	0.563	0.122	0	Macrophage 1
ALDH2	0	0	0.472016	0.847	0.486	0	Macrophage 1
OAS1	0	0	0.470175	0.803	0.404	0	Macrophage 1
LAIR1	0	0	0.469239	0.879	0.436	0	Macrophage 1
LILRB2	0	0	0.468301	0.866	0.452	0	Macrophage 1
RAP2B	0	0	0.466882	0.949	0.602	0	Macrophage 1
RGL1	0	0	0.462877	0.735	0.316	0	Macrophage 1
MYOF	0	0	0.461909	0.89	0.519	0	Macrophage 1
FCGR1A	0	0	0.459331	0.818	0.429	0	Macrophage 1
HNMT	0	0	0.459193	0.939	0.57	0	Macrophage 1
EPB41L3	0	0	0.458806	0.853	0.441	0	Macrophage 1
CYFIP1	0	0	0.458498	0.889	0.507	0	Macrophage 1
NRP1	0	0	0.45695	0.745	0.292	0	Macrophage 1
AGFG1	0	0	0.455942	0.858	0.487	0	Macrophage 1
SECTM1	0	0	0.453997	0.65	0.25	0	Macrophage 1
WSB1	0	0	0.452409	0.977	0.728	0	Macrophage 1
TIMD4	0	0	0.44753	0.427	0.091	0	Macrophage 1
MOB1A	0	0	0.446748	0.983	0.765	0	Macrophage 1
MTSS1	0	0	0.445142	0.749	0.294	0	Macrophage 1
TTYH3	0	0	0.443165	0.86	0.414	0	Macrophage 1
CTSA	0	0	0.442224	0.853	0.456	0	Macrophage 1
TMEM37	0	0	0.440858	0.609	0.148	0	Macrophage 1
TCN2	0	0	0.440794	0.621	0.169	0	Macrophage 1
SNX6	0	0	0.43797	0.978	0.77	0	Macrophage 1
SCPEP1	0	0	0.436911	0.759	0.385	0	Macrophage 1
GRB2	0	0	0.435444	0.987	0.754	0	Macrophage 1
PAPSS2	0	0	0.434347	0.696	0.287	0	Macrophage 1
CD4	0	0	0.434039	0.925	0.595	0	Macrophage 1
ABI3	0	0	0.433994	0.845	0.442	0	Macrophage 1
METTL7A	0	0	0.433929	0.763	0.399	0	Macrophage 1
RIN2	0	0	0.433882	0.764	0.347	0	Macrophage 1
SULT1A1	0	0	0.429748	0.65	0.249	0	Macrophage 1
SPG21	0	0	0.427985	0.889	0.517	0	Macrophage 1
LGALS9	0	0	0.425862	0.933	0.588	0	Macrophage 1
TREM2	0	0	0.425243	0.731	0.317	0	Macrophage 1
MFSD1	0	0	0.4234	0.916	0.566	0	Macrophage 1
PLTP	0	0	0.42244	0.554	0.194	0	Macrophage 1
NINJ1	0	0	0.420242	0.741	0.308	0	Macrophage 1
GLMP	0	0	0.419369	0.714	0.27	0	Macrophage 1
MPP1	0	0	0.418775	0.848	0.411	0	Macrophage 1
CD84	0	0	0.417657	0.969	0.646	0	Macrophage 1
LAMP2	0	0	0.414972	0.906	0.554	0	Macrophage 1
ME1	0	0	0.414924	0.559	0.132	0	Macrophage 1
COLGALT1	0	0	0.414	0.796	0.388	0	Macrophage 1
SPI1	0	0	0.413995	0.947	0.624	0	Macrophage 1
SIDT2	0	0	0.413719	0.585	0.181	0	Macrophage 1
MGLL	0	0	0.413253	0.629	0.194	0	Macrophage 1
MCOLN1	0	0	0.412988	0.763	0.348	0	Macrophage 1
VAMP8	0	0	0.41058	0.993	0.878	0	Macrophage 1
SERPINA1	0	0	0.410006	0.903	0.549	0	Macrophage 1
FKBP15	0	0	0.409828	0.851	0.488	0	Macrophage 1
P2RX7	0	0	0.409078	0.635	0.258	0	Macrophage 1
H2AFY	0	0	0.405359	0.985	0.737	0	Macrophage 1
IQGAP1	0	0	0.40515	0.991	0.824	0	Macrophage 1
AP2A2	0	0	0.403631	0.816	0.398	0	Macrophage 1
EPB41L2	0	0	0.402626	0.756	0.392	0	Macrophage 1
CLTC	0	0	0.401487	0.971	0.678	0	Macrophage 1
CAB39	0	0	0.400345	0.924	0.59	0	Macrophage 1
SLCO2B1	0	0	0.400055	0.689	0.266	0	Macrophage 1
LMNA	0	0	0.399625	0.765	0.357	0	Macrophage 1
RASGEF1B	0	0	0.398693	0.688	0.303	0	Macrophage 1
RRAS	0	0	0.398095	0.775	0.408	0	Macrophage 1
SLC35F6	0	0	0.394781	0.724	0.311	0	Macrophage 1
CLIP4	0	0	0.392873	0.643	0.218	0	Macrophage 1
IDH1	0	0	0.392019	0.757	0.385	0	Macrophage 1
LILRB4	0	0	0.391865	0.71	0.359	0	Macrophage 1
CAPZA2	0	0	0.391566	0.977	0.716	0	Macrophage 1
CLTA	0	0	0.387889	0.984	0.78	0	Macrophage 1
RHOQ	0	0	0.384153	0.846	0.487	0	Macrophage 1
NR1H3	0	0	0.384145	0.517	0.136	0	Macrophage 1
SNX24	0	0	0.383151	0.69	0.271	0	Macrophage 1
SRGAP2	0	0	0.381611	0.766	0.404	0	Macrophage 1
PIK3AP1	0	0	0.375878	0.818	0.441	0	Macrophage 1
SMIM3	0	0	0.372675	0.568	0.177	0	Macrophage 1
TLR4	0	0	0.371	0.754	0.356	0	Macrophage 1
PLEKHO2	0	0	0.370611	0.824	0.439	0	Macrophage 1
GCH1	0	0	0.369698	0.616	0.246	0	Macrophage 1
AP1B1	0	0	0.366442	0.81	0.417	0	Macrophage 1
SLC7A8	0	0	0.364738	0.618	0.198	0	Macrophage 1
NADK	0	0	0.363538	0.663	0.277	0	Macrophage 1
MKNK1	0	0	0.363015	0.778	0.389	0	Macrophage 1
NTAN1	0	0	0.362217	0.764	0.397	0	Macrophage 1
P2RX4	0	0	0.353649	0.733	0.342	0	Macrophage 1
FUCA1	0	0	0.351641	0.598	0.25	0	Macrophage 1
RNPEP	0	0	0.350837	0.782	0.415	0	Macrophage 1
HLA-A	0	0	0.348755	1	0.977	0	Macrophage 1
MLXIPL	0	0	0.340724	0.516	0.168	0	Macrophage 1
SGMS1	0	0	0.340629	0.644	0.268	0	Macrophage 1
NFAM1	0	0	0.338182	0.593	0.221	0	Macrophage 1
HK3	0	0	0.337963	0.578	0.198	0	Macrophage 1
LACC1	0	0	0.337629	0.604	0.244	0	Macrophage 1
RP11-598F7.3	0	0	0.337288	0.388	0.087	0	Macrophage 1
MERTK	0	0	0.308212	0.498	0.173	0	Macrophage 1
PLPP3	0	0	0.289378	0.397	0.1	0	Macrophage 1
GPR137B	0	0	0.288011	0.555	0.217	0	Macrophage 1
RPL35	0	0	-0.355346	0.998	0.981	0	Macrophage 1
RPL36	0	0	-0.375196	0.999	0.982	0	Macrophage 1
RPL9	0	0	-0.381464	0.997	0.985	0	Macrophage 1
FAU	0	0	-0.38236	0.998	0.981	0	Macrophage 1
RPLP2	0	0	-0.397211	0.999	0.986	0	Macrophage 1
RPLP1	0	0	-0.438859	1	0.993	0	Macrophage 1
RPS19	0	0	-0.442875	0.999	0.987	0	Macrophage 1
RPL7	0	0	-0.447564	0.991	0.973	0	Macrophage 1
RPL37A	0	0	-0.451478	0.999	0.984	0	Macrophage 1
RPS12	0	0	-0.47303	0.998	0.989	0	Macrophage 1
RPS6	0	0	-0.473047	0.997	0.984	0	Macrophage 1
RPS13	0	0	-0.474085	0.995	0.979	0	Macrophage 1
RPS21	0	0	-0.477025	0.993	0.973	0	Macrophage 1
RPS24	0	0	-0.477573	0.999	0.99	0	Macrophage 1
RPL15	0	0	-0.47941	0.998	0.982	0	Macrophage 1
RPS5	0	0	-0.479746	0.986	0.965	0	Macrophage 1
RPL13A	0	0	-0.481178	0.999	0.986	0	Macrophage 1
RPS25	0	0	-0.485409	0.994	0.978	0	Macrophage 1
RPS10	0	0	-0.486155	0.986	0.964	0	Macrophage 1
RPL28	0	0	-0.49632	0.999	0.99	0	Macrophage 1
RPL37	0	0	-0.500965	0.998	0.984	0	Macrophage 1
RPL39	0	0	-0.512536	0.999	0.988	0	Macrophage 1
RPL6	0	0	-0.51351	0.998	0.981	0	Macrophage 1
RPL29	0	0	-0.516737	0.995	0.978	0	Macrophage 1
RPL24	0	0	-0.518849	0.993	0.973	0	Macrophage 1
RPS8	0	0	-0.530137	0.998	0.986	0	Macrophage 1
RPS23	0	0	-0.530635	0.999	0.985	0	Macrophage 1
RPL41	0	0	-0.534179	0.997	0.99	0	Macrophage 1
RPS15	0	0	-0.538014	0.997	0.983	0	Macrophage 1
RPS3A	0	0	-0.545401	0.999	0.985	0	Macrophage 1
RPS2	0	0	-0.556159	0.999	0.986	0	Macrophage 1
RPL13	0	0	-0.559149	1	0.992	0	Macrophage 1
RPL18A	0	0	-0.559903	0.998	0.983	0	Macrophage 1
RPL34	0	0	-0.56491	0.999	0.986	0	Macrophage 1
RPS29	0	0	-0.571956	0.998	0.985	0	Macrophage 1
RPL26	0	0	-0.581255	0.996	0.984	0	Macrophage 1
RPS27A	0	0	-0.584077	0.998	0.987	0	Macrophage 1
RPL11	0	0	-0.588043	0.997	0.984	0	Macrophage 1
RPL19	0	0	-0.589426	0.999	0.982	0	Macrophage 1
RPL14	0	0	-0.601884	0.991	0.976	0	Macrophage 1
RPL10A	0	0	-0.603211	0.988	0.968	0	Macrophage 1
RPS7	0	0	-0.605331	0.997	0.978	0	Macrophage 1
RPL32	0	0	-0.605532	0.997	0.987	0	Macrophage 1
RPL30	0	0	-0.617593	0.998	0.986	0	Macrophage 1
RPL7A	0	0	-0.61972	0.996	0.977	0	Macrophage 1
RPSA	0	0	-0.629288	0.985	0.967	0	Macrophage 1
RPL35A	0	0	-0.632755	0.994	0.977	0	Macrophage 1
RPS14	0	0	-0.633125	0.998	0.985	0	Macrophage 1
RPS27	0	0	-0.639464	0.998	0.989	0	Macrophage 1
RPL18	0	0	-0.647461	0.995	0.979	0	Macrophage 1
RPL10	0	0	-0.658444	0.999	0.991	0	Macrophage 1
RPL5	0	0	-0.666554	0.988	0.971	0	Macrophage 1
RPL23A	0	0	-0.684972	0.993	0.976	0	Macrophage 1
RPL3	0	0	-0.693551	0.995	0.981	0	Macrophage 1
RPS18	0	0	-0.695655	0.999	0.988	0	Macrophage 1
RPS15A	0	0	-0.699737	0.997	0.982	0	Macrophage 1
RPS4X	0	0	-0.706029	0.997	0.984	0	Macrophage 1
LSP1	0	0	-0.790788	0.278	0.611	0	Macrophage 1
RPS3	0	0	-0.856303	0.991	0.979	0	Macrophage 1
CD2	0	0	-1.32086	0.027	0.413	0	Macrophage 1
DNASE2	6.01e-308	1.21e-303	0.293405	0.508	0.182	0	Macrophage 1
TSPAN14	9.06e-308	1.83e-303	0.364359	0.762	0.395	0	Macrophage 1
UNC93B1	1.42e-306	2.86e-302	0.362486	0.772	0.416	0	Macrophage 1
SLC39A8	1.76e-306	3.55e-302	0.419225	0.661	0.3	0	Macrophage 1
GBA	1.53e-305	3.09e-301	0.297583	0.609	0.258	0	Macrophage 1
RAB20	1.99e-305	4.01e-301	0.26719	0.48	0.17	0	Macrophage 1
LY96	5.94e-304	1.2e-299	0.394766	0.87	0.532	0	Macrophage 1
NACA	7.84e-301	1.58e-296	-0.420606	0.99	0.972	0	Macrophage 1
SPRED1	1.63e-298	3.29e-294	0.371445	0.738	0.37	0	Macrophage 1
TMBIM6	1.72e-298	3.45e-294	0.340338	0.994	0.866	0	Macrophage 1
ZEB2	2.88e-298	5.8e-294	0.436422	0.99	0.718	0	Macrophage 1
SNX2	1.05e-297	2.12e-293	0.383721	0.933	0.627	0	Macrophage 1
TIMP1	1.09e-297	2.19e-293	0.419751	0.991	0.736	0	Macrophage 1
MYLIP	4.3e-297	8.65e-293	0.312669	0.46	0.16	0	Macrophage 1
RPL8	4.97e-297	1e-292	-0.342351	0.998	0.98	0	Macrophage 1
CALM3	2.46e-296	4.95e-292	0.385736	0.971	0.69	0	Macrophage 1
FCN1	1.35e-295	2.72e-291	0.394426	0.952	0.536	0	Macrophage 1
EEF1B2	1.65e-295	3.33e-291	-0.478501	0.985	0.955	0	Macrophage 1
NRP2	1.48e-294	2.98e-290	0.283897	0.569	0.225	0	Macrophage 1
RHOA	1.09e-292	2.19e-288	0.333462	0.997	0.892	0	Macrophage 1
RPL31	3.56e-289	7.18e-285	-0.472086	0.977	0.946	0	Macrophage 1
TUBB	6.19e-289	1.25e-284	0.356439	0.982	0.705	0	Macrophage 1
RPS16	3.67e-286	7.39e-282	-0.381488	0.997	0.983	0	Macrophage 1
CTNNA1	8.84e-286	1.78e-281	0.364822	0.847	0.502	0	Macrophage 1
PECAM1	1.84e-284	3.7e-280	0.317219	0.757	0.401	0	Macrophage 1
FNDC3B	2.9e-284	5.83e-280	0.336379	0.746	0.38	0	Macrophage 1
GNB2L1	9.55e-284	1.92e-279	-0.438357	0.992	0.961	0	Macrophage 1
PDCD6IP	1.2e-283	2.42e-279	0.355953	0.87	0.546	0	Macrophage 1
LRRC25	6.4e-283	1.29e-278	0.355244	0.814	0.478	0	Macrophage 1
RPL27A	2.4e-282	4.83e-278	-0.347968	0.997	0.982	0	Macrophage 1
RPL27	8.13e-282	1.64e-277	-0.332028	0.995	0.973	0	Macrophage 1
ANXA4	3.89e-281	7.84e-277	0.360286	0.879	0.527	0	Macrophage 1
RAB1A	1.98e-280	3.98e-276	0.338334	0.846	0.496	0	Macrophage 1
ACTR2	2.76e-280	5.55e-276	0.339285	0.995	0.865	0	Macrophage 1
LHFPL2	4.57e-280	9.21e-276	0.321627	0.607	0.257	0	Macrophage 1
FRMD4B	8.14e-280	1.64e-275	0.359309	0.803	0.463	0	Macrophage 1
SOD2	2.64e-279	5.32e-275	0.450996	0.802	0.474	0	Macrophage 1
COMT	1.21e-278	2.44e-274	0.361211	0.832	0.511	0	Macrophage 1
LMO2	3.27e-277	6.59e-273	0.379841	0.915	0.585	0	Macrophage 1
GAA	4.78e-276	9.64e-272	0.292106	0.62	0.288	0	Macrophage 1
ATP6V1A	5.19e-275	1.05e-270	0.317327	0.76	0.413	0	Macrophage 1
GNPDA1	1.95e-274	3.92e-270	0.338457	0.747	0.389	0	Macrophage 1
RXRA	4.48e-274	9.02e-270	0.324001	0.724	0.376	0	Macrophage 1
SERF2	3.54e-273	7.13e-269	0.250106	0.999	0.977	0	Macrophage 1
ZFHX3	1.36e-272	2.73e-268	0.36973	0.797	0.451	0	Macrophage 1
PTMA	4.18e-271	8.41e-267	-0.304246	1	0.991	0	Macrophage 1
GNPTAB	5.26e-271	1.06e-266	0.3269	0.854	0.51	0	Macrophage 1
MT-ND2	1.08e-270	2.17e-266	0.279733	0.998	0.982	0	Macrophage 1
ITSN1	2.67e-270	5.38e-266	0.277728	0.568	0.238	0	Macrophage 1
STAB1	1.31e-269	2.64e-265	0.364969	0.8	0.41	0	Macrophage 1
GRINA	5.11e-269	1.03e-264	0.305628	0.703	0.366	0	Macrophage 1
NAGA	6.58e-269	1.33e-264	0.329347	0.759	0.43	0	Macrophage 1
ANXA5	1.9e-267	3.82e-263	0.352783	0.995	0.818	0	Macrophage 1
GPBAR1	5.25e-267	1.06e-262	0.294914	0.551	0.237	0	Macrophage 1
AKR1A1	2.01e-266	4.06e-262	0.337332	0.872	0.554	0	Macrophage 1
NPC2	5.98e-266	1.2e-261	0.405058	0.999	0.761	0	Macrophage 1
IL6ST	7.93e-266	1.6e-261	0.320645	0.643	0.314	0	Macrophage 1
TMBIM1	5.39e-265	1.09e-260	0.270415	0.597	0.27	0	Macrophage 1
CPEB4	1.32e-264	2.67e-260	0.314282	0.741	0.4	0	Macrophage 1
NCKAP1L	1.81e-264	3.65e-260	0.35179	0.946	0.667	0	Macrophage 1
FGD4	3.73e-264	7.52e-260	0.341719	0.738	0.409	0	Macrophage 1
SGTB	4.92e-264	9.9e-260	0.279405	0.619	0.281	0	Macrophage 1
ITGB5	1.45e-263	2.92e-259	0.292831	0.655	0.316	0	Macrophage 1
WARS	7.76e-263	1.56e-258	0.407232	0.76	0.434	0	Macrophage 1
CNDP2	3.43e-262	6.9e-258	0.339881	0.849	0.52	0	Macrophage 1
ATP6V1B2	5.03e-262	1.01e-257	0.322831	0.819	0.474	0	Macrophage 1
IFI44L	2.52e-261	5.07e-257	0.447361	0.576	0.266	0	Macrophage 1
ZDHHC20	2.61e-260	5.26e-256	0.293741	0.739	0.386	0	Macrophage 1
CSTB	6.21e-260	1.25e-255	0.353026	0.992	0.853	0	Macrophage 1
THEMIS2	1.71e-259	3.45e-255	0.322997	0.775	0.44	0	Macrophage 1
TFEC	7.99e-259	1.61e-254	0.332754	0.771	0.435	0	Macrophage 1
RPL21	4.39e-258	8.85e-254	-0.315266	0.999	0.987	0	Macrophage 1
HAVCR2	2.52e-257	5.08e-253	0.311356	0.805	0.458	0	Macrophage 1
NCOA4	1.02e-256	2.05e-252	0.334031	0.893	0.582	0	Macrophage 1
PARP14	2.58e-256	5.19e-252	0.390796	0.827	0.518	0	Macrophage 1
KCNE3	3.38e-255	6.81e-251	0.266689	0.568	0.255	0	Macrophage 1
CELF1	9.51e-255	1.92e-250	0.350543	0.869	0.558	0	Macrophage 1
OAS3	1.08e-254	2.17e-250	0.315306	0.587	0.275	0	Macrophage 1
GAS7	1.36e-253	2.73e-249	0.327276	0.786	0.433	0	Macrophage 1
SRGAP2C	2.7e-253	5.44e-249	0.326793	0.704	0.379	0	Macrophage 1
ARHGEF10L	1.44e-250	2.9e-246	0.270613	0.525	0.226	0	Macrophage 1
PGD	4.43e-250	8.93e-246	0.289285	0.675	0.349	0	Macrophage 1
COTL1	1.48e-249	2.98e-245	0.356102	1	0.825	0	Macrophage 1
CLEC12A	2.03e-249	4.08e-245	0.36605	0.844	0.514	0	Macrophage 1
LST1	1.36e-248	2.73e-244	0.382852	0.992	0.729	0	Macrophage 1
CD52	1.83e-248	3.69e-244	-1.01348	0.706	0.8	0	Macrophage 1
ARAP1	2.08e-247	4.2e-243	0.26603	0.63	0.303	0	Macrophage 1
RNF13	2.48e-247	5e-243	0.337793	0.862	0.554	0	Macrophage 1
FKBP1A	4.59e-247	9.24e-243	0.33703	0.985	0.757	0	Macrophage 1
FCGR1B	1.58e-246	3.19e-242	0.311423	0.585	0.276	0	Macrophage 1
TRIB1	1.6e-245	3.22e-241	0.345688	0.614	0.3	0	Macrophage 1
SNX9	2.24e-245	4.51e-241	0.290388	0.636	0.314	0	Macrophage 1
PARP9	5.64e-245	1.14e-240	0.3412	0.795	0.477	0	Macrophage 1
ADAM9	1.29e-244	2.59e-240	0.273629	0.72	0.371	0	Macrophage 1
PLEKHM2	6.96e-244	1.4e-239	0.254341	0.578	0.266	0	Macrophage 1
SLC31A1	5.73e-243	1.15e-238	0.292262	0.671	0.345	0	Macrophage 1
CD180	1.85e-242	3.72e-238	0.325383	0.725	0.408	0	Macrophage 1
RTN3	1.9e-242	3.84e-238	0.301495	0.821	0.505	0	Macrophage 1
STK10	7.6e-242	1.53e-237	0.346357	0.847	0.542	0	Macrophage 1
IFIT1	4.53e-241	9.12e-237	0.329061	0.387	0.136	0	Macrophage 1
IFIT2	5.84e-240	1.18e-235	0.348733	0.523	0.225	0	Macrophage 1
PLBD1	6.88e-240	1.39e-235	0.343064	0.727	0.424	0	Macrophage 1
IFI44	7.89e-240	1.59e-235	0.354498	0.674	0.361	0	Macrophage 1
ITGA4	2.55e-239	5.13e-235	-0.683781	0.168	0.47	0	Macrophage 1
KCTD12	5.04e-239	1.02e-234	0.368212	0.987	0.684	0	Macrophage 1
VASP	7.35e-239	1.48e-234	0.330222	0.956	0.672	0	Macrophage 1
ALOX5AP	6.89e-238	1.39e-233	-0.859641	0.396	0.625	0	Macrophage 1
IFI27	1.15e-237	2.32e-233	0.818466	0.333	0.103	0	Macrophage 1
DAZAP2	1.16e-237	2.33e-233	0.3152	0.971	0.769	0	Macrophage 1
MAP3K8	2.21e-237	4.44e-233	0.358058	0.863	0.54	0	Macrophage 1
RPS9	5.79e-237	1.17e-232	-0.334058	0.998	0.98	0	Macrophage 1
PTPRJ	1.43e-236	2.89e-232	0.302412	0.733	0.4	0	Macrophage 1
SNX10	2.84e-236	5.72e-232	0.36709	0.878	0.587	0	Macrophage 1
GBP1	8.04e-236	1.62e-231	0.449648	0.808	0.506	0	Macrophage 1
IQSEC1	1.26e-235	2.53e-231	0.256732	0.607	0.295	0	Macrophage 1
SAMSN1	3.87e-235	7.79e-231	0.310874	0.785	0.437	0	Macrophage 1
NECAP2	4.24e-235	8.55e-231	0.29491	0.812	0.495	0	Macrophage 1
DYNLT1	4.41e-235	8.88e-231	0.321642	0.879	0.597	0	Macrophage 1
ATOX1	1.14e-234	2.29e-230	0.343101	0.907	0.623	0	Macrophage 1
RGS12	1.86e-234	3.75e-230	0.25913	0.402	0.148	0	Macrophage 1
CD28	1.96e-234	3.95e-230	0.302324	0.475	0.185	0	Macrophage 1
CAPNS1	3.65e-234	7.36e-230	0.323774	0.942	0.688	0	Macrophage 1
RABGAP1	1.24e-233	2.49e-229	0.252391	0.551	0.253	0	Macrophage 1
PLA2G15	1.45e-233	2.91e-229	0.260488	0.554	0.251	0	Macrophage 1
NCF1	6.39e-233	1.29e-228	0.621223	0.779	0.503	0	Macrophage 1
PLXND1	6.93e-233	1.4e-228	0.252074	0.579	0.268	0	Macrophage 1
QKI	8.7e-233	1.75e-228	0.338553	0.948	0.663	0	Macrophage 1
UCP2	8.83e-233	1.78e-228	0.360043	0.953	0.699	0	Macrophage 1
ASGR1	1.32e-232	2.66e-228	0.282987	0.618	0.301	0	Macrophage 1
HCK	2.88e-232	5.8e-228	0.305934	0.795	0.479	0	Macrophage 1
SQRDL	2.83e-231	5.71e-227	0.297913	0.78	0.465	0	Macrophage 1
UBE2D1	5.81e-231	1.17e-226	0.286067	0.759	0.444	0	Macrophage 1
HLA-E	6.58e-231	1.33e-226	0.251435	0.997	0.94	0	Macrophage 1
NCEH1	4.87e-229	9.81e-225	0.274308	0.635	0.318	0	Macrophage 1
CLIC2	5.02e-229	1.01e-224	0.280491	0.593	0.29	0	Macrophage 1
EVI5	7.62e-229	1.54e-224	0.287315	0.644	0.338	0	Macrophage 1
RPS28	4.27e-228	8.61e-224	-0.28762	0.998	0.987	0	Macrophage 1
RNF130	5.17e-228	1.04e-223	0.332164	0.937	0.639	0	Macrophage 1
RHOU	7.25e-228	1.46e-223	0.278996	0.537	0.242	0	Macrophage 1
WDR26	1.03e-227	2.08e-223	0.287853	0.715	0.396	0	Macrophage 1
BTF3	2.04e-227	4.11e-223	-0.403077	0.961	0.918	0	Macrophage 1
PTPRO	1.23e-226	2.47e-222	0.275242	0.6	0.299	0	Macrophage 1
TMEM127	5.1e-226	1.03e-221	0.278586	0.675	0.368	0	Macrophage 1
HNRNPA1	6.71e-226	1.35e-221	-0.384215	0.963	0.921	0	Macrophage 1
FAM198B	1.9e-225	3.84e-221	0.282987	0.594	0.292	0	Macrophage 1
NLN	6.62e-225	1.33e-220	0.262593	0.573	0.272	0	Macrophage 1
MPEG1	9.23e-225	1.86e-220	0.294523	0.824	0.504	0	Macrophage 1
UBA52	2.45e-224	4.93e-220	-0.259758	0.998	0.983	0	Macrophage 1
SRGN	8.68e-224	1.75e-219	0.330407	0.998	0.921	0	Macrophage 1
SLC15A3	9.62e-223	1.94e-218	0.283982	0.704	0.389	0	Macrophage 1
PLA2G7	2e-222	4.02e-218	0.281564	0.329	0.105	0	Macrophage 1
SUB1	4.36e-222	8.78e-218	-0.452572	0.907	0.885	0	Macrophage 1
CFP	2.72e-221	5.48e-217	0.309613	0.733	0.409	0	Macrophage 1
NPM1	1.22e-220	2.46e-216	-0.439482	0.947	0.908	0	Macrophage 1
CKLF	1.33e-220	2.69e-216	-0.783058	0.555	0.681	0	Macrophage 1
IL2RG	2.49e-220	5.01e-216	-0.830458	0.208	0.489	0	Macrophage 1
STAT2	1.93e-219	3.88e-215	0.311671	0.758	0.449	0	Macrophage 1
PLD3	5.53e-219	1.11e-214	0.263225	0.653	0.339	0	Macrophage 1
SAT1	7.32e-218	1.47e-213	0.347225	0.987	0.783	0	Macrophage 1
KIAA1033	1.09e-217	2.19e-213	0.292688	0.792	0.48	0	Macrophage 1
RPLP0	9.68e-217	1.95e-212	-0.343303	0.992	0.953	0	Macrophage 1
HCST	2.07e-216	4.16e-212	-0.66795	0.826	0.856	0	Macrophage 1
MS4A6A	2.82e-216	5.69e-212	0.335474	0.996	0.68	0	Macrophage 1
FGR	1.51e-215	3.05e-211	0.296191	0.723	0.414	0	Macrophage 1
PILRA	2.49e-215	5.01e-211	0.279426	0.672	0.369	0	Macrophage 1
FAM91A1	4.49e-215	9.05e-211	0.274748	0.741	0.42	0	Macrophage 1
PABPC4	2.65e-214	5.33e-210	0.321781	0.85	0.56	0	Macrophage 1
SRGAP2B	1.05e-213	2.11e-209	0.287078	0.611	0.319	0	Macrophage 1
MX1	8.28e-213	1.67e-208	0.400167	0.716	0.417	0	Macrophage 1
DDX60L	1.13e-212	2.28e-208	0.298954	0.786	0.47	0	Macrophage 1
KYNU	3.49e-212	7.03e-208	0.275688	0.629	0.333	0	Macrophage 1
OAZ2	4.89e-212	9.84e-208	0.250268	0.663	0.36	0	Macrophage 1
GSTO1	2.46e-211	4.95e-207	0.323818	0.959	0.726	0	Macrophage 1
C9orf72	2.73e-211	5.49e-207	0.273818	0.665	0.359	0	Macrophage 1
TMEM106A	3.6e-210	7.26e-206	0.265117	0.66	0.357	0	Macrophage 1
CDKN1A	5.16e-210	1.04e-205	0.3973	0.792	0.497	0	Macrophage 1
IFNGR2	1.42e-209	2.86e-205	0.296257	0.889	0.575	0	Macrophage 1
TNFRSF1A	2.66e-209	5.36e-205	0.288278	0.815	0.511	0	Macrophage 1
EHBP1L1	2.99e-209	6.03e-205	0.275015	0.767	0.449	0	Macrophage 1
OSCAR	3.09e-209	6.22e-205	0.270389	0.561	0.281	0	Macrophage 1
TCIRG1	5.48e-209	1.1e-204	0.276195	0.767	0.455	0	Macrophage 1
CORO1C	6.73e-209	1.36e-204	0.269104	0.783	0.454	0	Macrophage 1
SNX13	9.91e-209	2e-204	0.251493	0.646	0.343	0	Macrophage 1
IL32	1.04e-208	2.1e-204	-1.98782	0.031	0.302	0	Macrophage 1
FCGR2A	1.56e-208	3.14e-204	0.285162	0.865	0.543	0	Macrophage 1
IL10RB	4.55e-207	9.16e-203	0.275114	0.762	0.449	0	Macrophage 1
RPL22	7.15e-207	1.44e-202	-0.302997	0.997	0.972	0	Macrophage 1
BTG1	1.52e-206	3.07e-202	-0.740484	0.876	0.899	0	Macrophage 1
ADAM10	1.66e-206	3.34e-202	0.27658	0.813	0.504	0	Macrophage 1
SNX18	3.87e-206	7.79e-202	0.273299	0.682	0.384	0	Macrophage 1
KDM1B	1.29e-205	2.6e-201	0.258749	0.62	0.329	0	Macrophage 1
LILRB3	1.75e-204	3.52e-200	0.285806	0.726	0.415	0	Macrophage 1
PABPC1	2.03e-204	4.1e-200	0.277734	0.998	0.916	0	Macrophage 1
TYMP	4.22e-203	8.5e-199	0.344321	0.996	0.767	0	Macrophage 1
BHLHE41	4.8e-203	9.67e-199	0.289308	0.345	0.123	0	Macrophage 1
GNB2	5.22e-203	1.05e-198	0.302827	0.951	0.702	0	Macrophage 1
OSBPL11	2.94e-202	5.93e-198	0.266007	0.719	0.416	0	Macrophage 1
RPS11	9.7e-202	1.95e-197	-0.323434	0.998	0.982	0	Macrophage 1
APOL6	1.58e-201	3.18e-197	0.359059	0.835	0.555	0	Macrophage 1
MYD88	2.98e-201	6e-197	0.302313	0.801	0.504	0	Macrophage 1
ICAM2	3.18e-201	6.41e-197	0.272916	0.685	0.388	0	Macrophage 1
MX2	9.05e-201	1.82e-196	0.319646	0.604	0.321	0	Macrophage 1
IFIH1	2.8e-200	5.64e-196	0.272592	0.546	0.271	0	Macrophage 1
NPTN	4.07e-200	8.19e-196	0.259562	0.68	0.379	0	Macrophage 1
RBMS1	1.74e-199	3.51e-195	0.284083	0.894	0.599	0	Macrophage 1
GPR183	1.81e-199	3.65e-195	-0.61501	0.121	0.403	0	Macrophage 1
STX12	2.36e-199	4.74e-195	0.288799	0.77	0.48	0	Macrophage 1
FAM20C	5.35e-199	1.08e-194	0.285754	0.637	0.335	0	Macrophage 1
TMEM30A	8.4e-199	1.69e-194	0.292263	0.784	0.483	0	Macrophage 1
ALOX5	8.52e-199	1.72e-194	0.269799	0.668	0.375	0	Macrophage 1
TIMP2	2.01e-198	4.06e-194	0.272447	0.84	0.524	0	Macrophage 1
HEXA	1.4e-197	2.82e-193	0.277632	0.709	0.414	0	Macrophage 1
NFIC	8.3e-197	1.67e-192	0.253514	0.7	0.392	0	Macrophage 1
DUSP6	3.07e-195	6.18e-191	0.269625	0.786	0.459	0	Macrophage 1
CST7	6.94e-195	1.4e-190	-0.911901	0.011	0.265	0	Macrophage 1
A2M	1.09e-194	2.19e-190	0.301743	0.775	0.438	0	Macrophage 1
KLF2	2.04e-194	4.11e-190	0.327584	0.971	0.758	0	Macrophage 1
EEF1D	3.76e-194	7.57e-190	-0.410082	0.962	0.93	0	Macrophage 1
TBXAS1	4.12e-192	8.31e-188	0.255598	0.605	0.322	0	Macrophage 1
TMEM123	1.02e-191	2.06e-187	0.287882	0.917	0.675	0	Macrophage 1
ARHGAP18	2.34e-191	4.72e-187	0.294578	0.928	0.637	0	Macrophage 1
ARRB2	2.67e-191	5.38e-187	0.272004	0.914	0.626	0	Macrophage 1
BLVRA	3.27e-191	6.59e-187	0.271255	0.748	0.441	0	Macrophage 1
ACAP2	3.69e-190	7.44e-186	0.27003	0.891	0.616	0	Macrophage 1
NUCB1	1.04e-189	2.1e-185	0.257933	0.72	0.431	0	Macrophage 1
LTBR	1.42e-189	2.87e-185	0.251368	0.635	0.35	0	Macrophage 1
MYO5A	2.72e-189	5.48e-185	0.250003	0.774	0.457	0	Macrophage 1
DICER1	9.75e-189	1.96e-184	0.271016	0.838	0.539	0	Macrophage 1
TPMT	1.38e-188	2.78e-184	0.264937	0.741	0.451	0	Macrophage 1
SKAP2	1.96e-188	3.95e-184	0.290113	0.962	0.688	0	Macrophage 1
PLEK	1.52e-187	3.06e-183	0.311379	0.972	0.742	0	Macrophage 1
TRIM14	3.19e-187	6.43e-183	0.256737	0.688	0.393	0	Macrophage 1
AHNAK	3.22e-187	6.49e-183	0.316637	0.991	0.863	0	Macrophage 1
ACAP1	5.21e-187	1.05e-182	-0.565864	0.012	0.259	0	Macrophage 1
MBD2	1.52e-186	3.07e-182	0.27659	0.848	0.577	0	Macrophage 1
HEXB	2.62e-185	5.27e-181	0.254806	0.682	0.395	0	Macrophage 1
RAPH1	7.35e-185	1.48e-180	0.274496	0.687	0.384	0	Macrophage 1
2020-03-02	1.01e-184	2.04e-180	0.252199	0.693	0.415	0	Macrophage 1
PLSCR1	8.6e-183	1.73e-178	0.299542	0.827	0.532	0	Macrophage 1
GZMA	1.58e-182	3.18e-178	-1.55071	0.015	0.257	0	Macrophage 1
RPL12	1.66e-182	3.33e-178	-0.251358	0.998	0.984	0	Macrophage 1
FCER1A	1.92e-182	3.87e-178	-1.33411	0.029	0.274	0	Macrophage 1
YBX3	2.1e-181	4.23e-177	0.269017	0.836	0.528	0	Macrophage 1
CSF1R	3.64e-181	7.34e-177	0.27451	0.844	0.536	0	Macrophage 1
OAS2	4.63e-181	9.32e-177	0.264634	0.652	0.368	0	Macrophage 1
NOP10	6.67e-181	1.34e-176	0.293409	0.931	0.735	0	Macrophage 1
PTBP3	7.52e-181	1.51e-176	0.305771	0.929	0.687	0	Macrophage 1
RAC1	7.92e-181	1.59e-176	0.272179	0.997	0.84	0	Macrophage 1
ATP2A2	2.16e-178	4.36e-174	0.253231	0.734	0.428	0	Macrophage 1
SLFN11	3.48e-178	7.01e-174	0.263048	0.675	0.389	0	Macrophage 1
HINT1	4.35e-178	8.77e-174	-0.466644	0.898	0.882	0	Macrophage 1
FAM120A	1.78e-177	3.58e-173	0.260582	0.884	0.593	0	Macrophage 1
ATP6V0D1	5.95e-177	1.2e-172	0.263465	0.903	0.613	0	Macrophage 1
CCL5	8.88e-177	1.79e-172	-2.49896	0.053	0.297	0	Macrophage 1
NCF2	1e-175	2.02e-171	0.265557	0.842	0.547	0	Macrophage 1
NKG7	3.12e-175	6.29e-171	-1.74649	0.036	0.276	0	Macrophage 1
EPS8	2.3e-174	4.63e-170	0.283618	0.769	0.474	0	Macrophage 1
EEF1A1	1.2e-173	2.43e-169	-0.290036	1	0.993	0	Macrophage 1
CD55	1.31e-171	2.65e-167	0.291689	0.793	0.518	0	Macrophage 1
ADAM15	1.89e-171	3.8e-167	0.264307	0.647	0.372	0	Macrophage 1
SLC25A19	2.97e-171	5.98e-167	0.277398	0.563	0.306	0	Macrophage 1
ICAM3	2.44e-170	4.92e-166	-0.464628	0.051	0.292	0	Macrophage 1
CRTAP	3.05e-170	6.14e-166	0.259498	0.785	0.508	0	Macrophage 1
ME2	3.21e-170	6.47e-166	0.252763	0.803	0.515	0	Macrophage 1
TOMM7	1.53e-169	3.09e-165	-0.41604	0.948	0.917	0	Macrophage 1
GOLGA4	3.14e-169	6.32e-165	0.265105	0.858	0.595	0	Macrophage 1
RPL38	6.75e-169	1.36e-164	-0.279844	0.995	0.972	0	Macrophage 1
VCL	1.17e-168	2.35e-164	0.301144	0.697	0.427	0	Macrophage 1
RPL36A	8.41e-168	1.69e-163	-0.383693	0.952	0.905	0	Macrophage 1
EIF4G3	2.25e-166	4.53e-162	0.253166	0.757	0.472	0	Macrophage 1
NAGK	4.72e-166	9.51e-162	0.275081	0.866	0.593	0	Macrophage 1
2020-03-01	3.2e-164	6.44e-160	0.280805	0.919	0.612	0	Macrophage 1
PLP2	7.44e-164	1.5e-159	-0.520746	0.184	0.426	0	Macrophage 1
CD44	1.25e-163	2.53e-159	0.270296	0.965	0.784	0	Macrophage 1
NAIP	1.45e-163	2.91e-159	0.254113	0.755	0.472	0	Macrophage 1
CD1C	1.5e-163	3.01e-159	-0.965542	0.048	0.278	0	Macrophage 1
DPYSL2	7.8e-163	1.57e-158	0.280276	0.93	0.653	0	Macrophage 1
HMGN1	3.26e-162	6.57e-158	-0.412955	0.805	0.82	0	Macrophage 1
LTB	1.54e-161	3.1e-157	-1.52747	0.136	0.372	0	Macrophage 1
RHOG	5.43e-161	1.09e-156	0.256633	0.927	0.671	0	Macrophage 1
FCER1G	2.59e-160	5.23e-156	0.322451	0.997	0.747	0	Macrophage 1
CCND1	6.54e-160	1.32e-155	0.2513	0.561	0.296	0	Macrophage 1
RNASET2	2.89e-159	5.82e-155	0.283333	0.927	0.692	0	Macrophage 1
P4HB	1.97e-158	3.97e-154	0.267296	0.874	0.605	0	Macrophage 1
FLNA	2.52e-158	5.07e-154	0.260611	0.933	0.69	0	Macrophage 1
CAPZA1	3.01e-158	6.06e-154	0.253452	0.967	0.767	0	Macrophage 1
H3F3B	5.52e-158	1.11e-153	-0.322312	0.996	0.971	0	Macrophage 1
TYROBP	2.81e-157	5.67e-153	0.301576	0.998	0.793	0	Macrophage 1
CCDC88A	3.63e-152	7.32e-148	0.27168	0.952	0.663	0	Macrophage 1
M6PR	1.55e-151	3.13e-147	0.254348	0.931	0.682	0	Macrophage 1
CANX	1.92e-151	3.87e-147	0.261478	0.955	0.715	0	Macrophage 1
EPSTI1	2.27e-149	4.58e-145	0.25977	0.766	0.499	0	Macrophage 1
CSK	5.75e-148	1.16e-143	0.262329	0.888	0.64	0	Macrophage 1
HSPB1	7.16e-146	1.44e-141	0.288601	0.844	0.583	0	Macrophage 1
CXCR4	2.78e-144	5.59e-140	-0.704061	0.042	0.254	0	Macrophage 1
XAF1	8.67e-144	1.75e-139	0.294008	0.772	0.52	0	Macrophage 1
RHOB	4.98e-143	1e-138	0.320315	0.785	0.503	0	Macrophage 1
IFITM2	3.79e-142	7.64e-138	-0.743274	0.68	0.734	0	Macrophage 1
ISG15	3.11e-139	6.26e-135	0.389891	0.819	0.598	0	Macrophage 1
ETS1	1.98e-138	3.98e-134	-0.719228	0.049	0.254	0	Macrophage 1
FXYD5	9.16e-138	1.84e-133	-0.451884	0.59	0.684	0	Macrophage 1
STAT1	1.89e-137	3.8e-133	0.289158	0.865	0.627	0	Macrophage 1
TPT1	3e-136	6.03e-132	-0.252695	1	0.995	0	Macrophage 1
C1orf162	4.49e-135	9.04e-131	0.27062	0.989	0.723	0	Macrophage 1
LAP3	8.17e-133	1.65e-128	0.266713	0.94	0.684	0	Macrophage 1
PPA1	3.83e-132	7.72e-128	-0.493271	0.367	0.534	0	Macrophage 1
LDHB	7.73e-132	1.56e-127	-0.544637	0.443	0.593	0	Macrophage 1
GAPDH	2.02e-131	4.06e-127	-0.274272	0.985	0.94	0	Macrophage 1
CD48	3.22e-131	6.49e-127	-0.562383	0.731	0.763	0	Macrophage 1
GPRIN3	1.87e-129	3.77e-125	-0.370687	0.126	0.343	0	Macrophage 1
MT2A	2.83e-128	5.71e-124	0.414567	0.744	0.506	0	Macrophage 1
LGALS1	4.27e-128	8.59e-124	-0.480285	0.934	0.883	0	Macrophage 1
PTPRC	1.08e-126	2.18e-122	-0.449886	0.981	0.943	0	Macrophage 1
GPAT3	1.7e-125	3.42e-121	-0.336078	0.067	0.268	0	Macrophage 1
MYL12A	1.02e-123	2.05e-119	-0.455553	0.958	0.93	0	Macrophage 1
IFI6	3.14e-123	6.32e-119	0.256301	0.737	0.495	0	Macrophage 1
HSPA5	2.31e-122	4.66e-118	0.338501	0.921	0.702	0	Macrophage 1
SET	3.23e-118	6.5e-114	-0.314086	0.934	0.881	0	Macrophage 1
MALAT1	5.75e-118	1.16e-113	-0.339261	0.999	0.991	0	Macrophage 1
HMGB1	6.31e-115	1.27e-110	-0.338387	0.987	0.954	0	Macrophage 1
STK17A	1.98e-113	3.99e-109	-0.779164	0.225	0.404	0	Macrophage 1
2020-09-07	1.12e-111	2.25e-107	-0.423918	0.902	0.881	0	Macrophage 1
RPL4	3.86e-111	7.78e-107	-0.26751	0.982	0.925	0	Macrophage 1
VMP1	1.96e-109	3.95e-105	0.265823	0.931	0.708	0	Macrophage 1
CALR	2.9e-109	5.84e-105	0.257002	0.973	0.792	0	Macrophage 1
RGS10	9.81e-108	1.98e-103	-0.442703	0.578	0.646	0	Macrophage 1
CCND2	1.31e-107	2.65e-103	-0.410361	0.179	0.37	0	Macrophage 1
MZT2A	6.93e-106	1.4e-101	-0.44193	0.288	0.456	0	Macrophage 1
RAC2	1.21e-104	2.44e-100	-0.512739	0.562	0.654	0	Macrophage 1
EMB	3.34e-103	6.73e-99	-0.483176	0.419	0.568	0	Macrophage 1
CAPG	4.27e-103	8.6e-99	-0.412982	0.218	0.399	0	Macrophage 1
COMMD6	9.3e-101	1.87e-96	-0.286779	0.95	0.899	0	Macrophage 1
LIMD2	1.03e-96	2.07e-92	-0.425638	0.459	0.581	0	Macrophage 1
ID2	7.33e-94	1.48e-89	-0.514797	0.595	0.695	0	Macrophage 1
AKNA	3.95e-91	7.96e-87	-0.379206	0.134	0.305	0	Macrophage 1
2020-09-06	4.16e-91	8.38e-87	-0.457998	0.486	0.592	0	Macrophage 1
BCL2	2.69e-90	5.42e-86	-0.449176	0.185	0.355	0	Macrophage 1
SSR4	8.06e-89	1.62e-84	-0.282365	0.878	0.84	0	Macrophage 1
STMN1	2.5e-87	5.04e-83	-0.5679	0.251	0.409	0	Macrophage 1
TSTD1	9.58e-85	1.93e-80	-0.384203	0.126	0.284	0	Macrophage 1
RPL17	4.5e-82	9.06e-78	-0.3809	0.7	0.726	0	Macrophage 1
ARL4C	1.79e-78	3.61e-74	-0.485931	0.673	0.712	0	Macrophage 1
FAM65B	1.65e-77	3.32e-73	-0.561917	0.211	0.353	0	Macrophage 1
TRAF3IP3	4.72e-76	9.5e-72	-0.499404	0.264	0.403	0	Macrophage 1
HIST1H4C	7.19e-74	1.45e-69	-0.470422	0.369	0.491	0	Macrophage 1
IER2	5.72e-72	1.15e-67	-0.403603	0.691	0.722	0	Macrophage 1
PNRC1	6.29e-72	1.27e-67	-0.388611	0.802	0.794	0	Macrophage 1
FYN	9.21e-69	1.85e-64	-0.407931	0.265	0.404	0	Macrophage 1
AP000769.1	2.24e-67	4.52e-63	-0.396561	0.251	0.391	0	Macrophage 1
MT-CYB	2.4e-66	4.84e-62	-0.254082	0.999	0.983	0	Macrophage 1
PSIP1	1.29e-61	2.59e-57	-0.37669	0.223	0.353	0	Macrophage 1
MZT2B	1.35e-61	2.71e-57	-0.302418	0.777	0.754	0	Macrophage 1
ZFP36L2	1.83e-60	3.68e-56	-0.373721	0.833	0.8	0	Macrophage 1
RGS2	1.16e-59	2.33e-55	-0.382669	0.147	0.283	0	Macrophage 1
HMGB2	7.22e-59	1.45e-54	-0.497691	0.315	0.426	0	Macrophage 1
STK17B	1.12e-58	2.25e-54	-0.396699	0.632	0.659	0	Macrophage 1
KIF2A	1.65e-58	3.33e-54	-0.367194	0.258	0.382	0	Macrophage 1
SPN	1.45e-57	2.92e-53	-0.28826	0.236	0.371	0	Macrophage 1
RBM39	2.38e-56	4.79e-52	-0.274732	0.878	0.838	0	Macrophage 1
PTMS	4e-52	8.06e-48	-0.402699	0.525	0.584	0	Macrophage 1
GLTSCR2	2.69e-50	5.41e-46	-0.355412	0.732	0.726	0	Macrophage 1
EIF3E	6.5e-50	1.31e-45	-0.252939	0.875	0.815	0	Macrophage 1
PDCD4	1.41e-47	2.85e-43	-0.460369	0.455	0.523	0	Macrophage 1
FAM107B	7.82e-47	1.58e-42	-0.433544	0.509	0.561	0	Macrophage 1
S1PR4	8.35e-45	1.68e-40	-0.29066	0.162	0.271	0	Macrophage 1
EIF3F	1.76e-44	3.54e-40	-0.259789	0.749	0.722	0	Macrophage 1
HIST1H1D	8.76e-44	1.76e-39	-0.340619	0.163	0.269	0	Macrophage 1
GSTP1	1.3e-42	2.62e-38	-0.261043	0.919	0.809	0	Macrophage 1
ARHGAP15	1.01e-41	2.03e-37	-0.308464	0.243	0.345	0	Macrophage 1
BTG2	2.87e-40	5.78e-36	-0.397435	0.421	0.483	0	Macrophage 1
UXT	3.31e-39	6.67e-35	-0.272675	0.692	0.684	0	Macrophage 1
ARPC5L	3.52e-39	7.1e-35	-0.35131	0.361	0.441	0	Macrophage 1
ARGLU1	2.01e-38	4.05e-34	-0.311404	0.727	0.712	0	Macrophage 1
C12orf57	4.31e-38	8.68e-34	-0.419789	0.298	0.382	0	Macrophage 1
HLA-DPB1	1.57e-37	3.16e-33	-1.02969	0.986	0.839	0	Macrophage 1
ERP29	7.89e-36	1.59e-31	-0.264875	0.69	0.677	0	Macrophage 1
CDC42EP3	4.95e-34	9.97e-30	-0.272296	0.174	0.266	0	Macrophage 1
ATP2B4	2.55e-33	5.14e-29	-0.258288	0.169	0.259	0	Macrophage 1
MRPS6	2.65e-33	5.34e-29	-0.261438	0.518	0.557	0	Macrophage 1
EPB41	7.6e-33	1.53e-28	-0.31559	0.187	0.272	0	Macrophage 1
CCDC85B	8.17e-32	1.65e-27	-0.269346	0.492	0.536	0	Macrophage 1
MBP	1.33e-31	2.68e-27	-0.327716	0.576	0.599	0	Macrophage 1
GSN	6.01e-30	1.21e-25	-0.28411	0.459	0.493	0	Macrophage 1
CYTIP	3.82e-28	7.7e-24	-0.293599	0.462	0.501	0	Macrophage 1
ZFAS1	1.31e-27	2.65e-23	-0.279143	0.72	0.683	0	Macrophage 1
FAM101B	2.49e-27	5.01e-23	-0.303049	0.181	0.259	0	Macrophage 1
YPEL3	1.39e-26	2.8e-22	-0.349364	0.256	0.324	0	Macrophage 1
CD37	6.97e-26	1.4e-21	-0.273307	0.768	0.713	0	Macrophage 1
C9orf142	1.12e-25	2.26e-21	-0.271038	0.432	0.477	0	Macrophage 1
SELL	2.03e-23	4.09e-19	-0.253961	0.22	0.292	0	Macrophage 1
OFD1	2.19e-22	4.41e-18	-0.251115	0.204	0.272	0	Macrophage 1
DDX24	2.29e-21	4.61e-17	-0.265596	0.815	0.776	0	Macrophage 1
VAMP2	1.51e-20	3.04e-16	-0.308954	0.48	0.509	0	Macrophage 1
HLA-DQA2	3.73e-20	7.52e-16	-0.376662	0.359	0.234	0	Macrophage 1
HLA-DRB1	6.27e-20	1.26e-15	-0.73585	0.993	0.828	0	Macrophage 1
CDC42SE2	6.51e-20	1.31e-15	-0.304968	0.62	0.604	0	Macrophage 1
APOBEC3G	3.12e-18	6.29e-14	-0.416822	0.363	0.398	0	Macrophage 1
CD99	5.34e-18	1.08e-13	-0.295751	0.707	0.67	0	Macrophage 1
HP1BP3	4.23e-17	8.51e-13	-0.26845	0.752	0.694	0	Macrophage 1
RAB11FIP1	6.93e-17	1.4e-12	-0.250124	0.459	0.474	0	Macrophage 1
HLA-DQA1	7.78e-16	1.57e-11	-1.04493	0.914	0.711	0	Macrophage 1
STK4	6.61e-15	1.33e-10	-0.271826	0.825	0.779	0	Macrophage 1
HLA-DPA1	9.28e-15	1.87e-10	-0.72436	0.994	0.837	0	Macrophage 1
EVL	1.38e-11	2.77e-07	-0.308092	0.541	0.537	0	Macrophage 1
KMT2A	2.61e-11	5.26e-07	-0.297986	0.457	0.464	0	Macrophage 1
HLA-DQB1	1.28e-10	2.58e-06	-0.803076	0.929	0.712	0	Macrophage 1
VCAN	3.04e-09	6.13e-05	-0.797885	0.3	0.312	0	Macrophage 1
DUT	1.07e-07	0.00214518	-0.255797	0.494	0.479	0	Macrophage 1
LYAR	1.97e-06	0.0396622	-0.307766	0.415	0.412	0	Macrophage 1
RARRES3	3.74e-05	0.753626	-0.394269	0.598	0.547	0	Macrophage 1
CPVL	3.85e-05	0.775252	-0.259999	0.862	0.606	0	Macrophage 1
SYNE1	0.00123508	1	-0.25368	0.262	0.265	0	Macrophage 1
GIMAP7	0.00169277	1	-0.428238	0.615	0.538	0	Macrophage 1
BASP1	0.00556949	1	-0.269819	0.469	0.427	0	Macrophage 1
HLA-DRA	0.00978145	1	-0.580191	1	0.85	0	Macrophage 1
VCAN	0	0	1.95031	0.838	0.222	1	Macrophage 2
FCN1	0	0	1.39599	0.996	0.538	1	Macrophage 2
S100A9	0	0	1.28882	0.995	0.654	1	Macrophage 2
LYZ	0	0	1.25647	0.998	0.712	1	Macrophage 2
RETN	0	0	1.14163	0.89	0.422	1	Macrophage 2
S100A8	0	0	1.13437	0.958	0.518	1	Macrophage 2
CD36	0	0	1.01485	0.911	0.397	1	Macrophage 2
APOBEC3A	0	0	0.915809	0.528	0.074	1	Macrophage 2
DUSP6	0	0	0.890228	0.884	0.45	1	Macrophage 2
TIMP1	0	0	0.806665	0.985	0.743	1	Macrophage 2
SERPINA1	0	0	0.79253	0.952	0.549	1	Macrophage 2
MNDA	0	0	0.777526	0.988	0.679	1	Macrophage 2
AP1S2	0	0	0.729693	0.995	0.763	1	Macrophage 2
FOS	0	0	0.709922	0.982	0.716	1	Macrophage 2
CYBB	0	0	0.682466	0.998	0.69	1	Macrophage 2
AIF1	0	0	0.652601	0.999	0.757	1	Macrophage 2
PLAC8	0	0	0.645218	0.555	0.22	1	Macrophage 2
FGL2	0	0	0.641075	0.971	0.663	1	Macrophage 2
RNF141	0	0	0.641053	0.83	0.429	1	Macrophage 2
CD300E	0	0	0.63377	0.64	0.224	1	Macrophage 2
APLP2	0	0	0.628033	0.992	0.725	1	Macrophage 2
CTSS	0	0	0.626149	0.998	0.805	1	Macrophage 2
TYMP	0	0	0.624281	0.996	0.772	1	Macrophage 2
MARCKS	0	0	0.600844	0.981	0.701	1	Macrophage 2
STXBP2	0	0	0.60045	0.793	0.425	1	Macrophage 2
TYROBP	0	0	0.589688	0.999	0.798	1	Macrophage 2
RBP7	0	0	0.589382	0.634	0.217	1	Macrophage 2
NAMPT	0	0	0.588098	0.928	0.635	1	Macrophage 2
MPEG1	0	0	0.58577	0.853	0.507	1	Macrophage 2
LILRB2	0	0	0.585407	0.868	0.462	1	Macrophage 2
S100A12	0	0	0.581935	0.37	0.028	1	Macrophage 2
CSTA	0	0	0.573864	0.866	0.514	1	Macrophage 2
C5AR1	0	0	0.573708	0.897	0.445	1	Macrophage 2
LST1	0	0	0.565236	0.995	0.735	1	Macrophage 2
FCGR3A	0	0	0.556664	0.968	0.588	1	Macrophage 2
CEBPB	0	0	0.542609	0.984	0.73	1	Macrophage 2
ASGR1	0	0	0.539252	0.714	0.292	1	Macrophage 2
LILRB1	0	0	0.534337	0.734	0.362	1	Macrophage 2
CD93	0	0	0.534325	0.577	0.218	1	Macrophage 2
FCGR1A	0	0	0.530405	0.812	0.439	1	Macrophage 2
LINC01272	0	0	0.527855	0.774	0.409	1	Macrophage 2
ZEB2	0	0	0.519721	0.983	0.726	1	Macrophage 2
DMXL2	0	0	0.487729	0.827	0.419	1	Macrophage 2
TLR2	0	0	0.48239	0.728	0.376	1	Macrophage 2
S100A6	0	0	0.48225	0.998	0.98	1	Macrophage 2
NEAT1	0	0	0.480041	0.998	0.92	1	Macrophage 2
RCBTB2	0	0	0.477404	0.725	0.376	1	Macrophage 2
FPR1	0	0	0.469779	0.667	0.33	1	Macrophage 2
BST1	0	0	0.46166	0.582	0.218	1	Macrophage 2
CYBA	0	0	0.459367	0.997	0.942	1	Macrophage 2
CLEC5A	0	0	0.444639	0.409	0.109	1	Macrophage 2
S100A11	0	0	0.439984	0.999	0.952	1	Macrophage 2
S100A4	0	0	0.434218	0.999	0.959	1	Macrophage 2
TSPO	0	0	0.420546	0.984	0.836	1	Macrophage 2
ITGB2	0	0	0.410949	0.995	0.865	1	Macrophage 2
CFD	0	0	0.38118	0.94	0.523	1	Macrophage 2
OAZ1	0	0	0.304902	0.999	0.966	1	Macrophage 2
DUSP1	5.67e-308	1.14e-303	0.575422	0.923	0.638	1	Macrophage 2
ARL4C	3.06e-305	6.16e-301	-0.838735	0.445	0.75	1	Macrophage 2
H3F3A	2.25e-304	4.53e-300	0.310641	0.998	0.978	1	Macrophage 2
MAFB	2.05e-303	4.13e-299	0.58146	0.973	0.58	1	Macrophage 2
CLEC7A	8.71e-303	1.76e-298	0.4817	0.785	0.457	1	Macrophage 2
LTA4H	1.44e-296	2.9e-292	0.481003	0.913	0.596	1	Macrophage 2
ZFP36L1	3.53e-294	7.11e-290	0.510646	0.996	0.849	1	Macrophage 2
LILRA5	2.02e-292	4.07e-288	0.332804	0.369	0.108	1	Macrophage 2
CLEC12A	5.05e-287	1.02e-282	0.508622	0.832	0.523	1	Macrophage 2
LILRB3	1.37e-285	2.76e-281	0.455392	0.74	0.42	1	Macrophage 2
TMEM170B	2.06e-283	4.15e-279	0.370018	0.504	0.204	1	Macrophage 2
TGFBI	8.61e-283	1.74e-278	0.463853	0.907	0.592	1	Macrophage 2
GPR65	1.59e-275	3.19e-271	0.466775	0.901	0.616	1	Macrophage 2
SLC7A7	2.23e-272	4.5e-268	0.422981	0.755	0.419	1	Macrophage 2
CD2	4.29e-266	8.65e-262	-1.27435	0.044	0.401	1	Macrophage 2
IFI30	4e-255	8.05e-251	0.465785	0.768	0.451	1	Macrophage 2
FBP1	4.05e-255	8.16e-251	0.539048	0.82	0.531	1	Macrophage 2
SH3BGRL3	5.04e-252	1.01e-247	0.302628	1	0.978	1	Macrophage 2
MEGF9	8.25e-250	1.66e-245	0.374471	0.523	0.236	1	Macrophage 2
NCF2	5.75e-248	1.16e-243	0.419664	0.846	0.554	1	Macrophage 2
C9orf72	7.21e-248	1.45e-243	0.384533	0.663	0.366	1	Macrophage 2
IFNGR2	1.02e-245	2.06e-241	0.397701	0.883	0.583	1	Macrophage 2
PPT1	9.35e-245	1.88e-240	0.390654	0.883	0.601	1	Macrophage 2
KCTD12	1.24e-243	2.49e-239	0.427042	0.98	0.692	1	Macrophage 2
POU2F2	1.68e-243	3.38e-239	0.481007	0.837	0.548	1	Macrophage 2
SRGN	1.18e-241	2.39e-237	0.362932	0.999	0.922	1	Macrophage 2
MYOF	1.35e-234	2.71e-230	0.401258	0.832	0.537	1	Macrophage 2
LCP1	1.36e-234	2.75e-230	0.344842	0.996	0.926	1	Macrophage 2
IFNGR1	3.15e-232	6.35e-228	0.39663	0.877	0.614	1	Macrophage 2
JUNB	1.44e-229	2.9e-225	0.408976	0.985	0.823	1	Macrophage 2
LILRA2	2.7e-228	5.44e-224	0.312267	0.488	0.217	1	Macrophage 2
KLF3	4.12e-224	8.29e-220	0.404431	0.854	0.579	1	Macrophage 2
CSF1R	9.86e-222	1.99e-217	0.379889	0.845	0.543	1	Macrophage 2
MEF2C	2.7e-220	5.43e-216	0.38876	0.958	0.66	1	Macrophage 2
CD14	9.4e-219	1.89e-214	0.404785	0.975	0.588	1	Macrophage 2
HSBP1	1.74e-215	3.51e-211	0.362574	0.931	0.698	1	Macrophage 2
TKT	1.68e-213	3.38e-209	0.401976	0.872	0.636	1	Macrophage 2
VAMP8	2.91e-213	5.86e-209	0.309603	0.994	0.88	1	Macrophage 2
FCGR1B	1.69e-212	3.41e-208	0.349383	0.567	0.286	1	Macrophage 2
CYP1B1	1.59e-211	3.21e-207	0.522259	0.554	0.25	1	Macrophage 2
C1QB	5.56e-209	1.12e-204	-1.50988	0.272	0.545	1	Macrophage 2
GPX1	5.98e-208	1.2e-203	0.385853	0.995	0.781	1	Macrophage 2
VASP	2.48e-206	4.99e-202	0.357617	0.94	0.681	1	Macrophage 2
COTL1	2.38e-204	4.8e-200	0.355056	0.998	0.829	1	Macrophage 2
NPC2	1.41e-200	2.84e-196	0.362136	0.993	0.767	1	Macrophage 2
LRRC25	6.64e-200	1.34e-195	0.346095	0.769	0.494	1	Macrophage 2
GNS	1.36e-199	2.74e-195	0.320542	0.815	0.489	1	Macrophage 2
RP11-1143G9.4	1.05e-197	2.12e-193	0.327619	0.391	0.157	1	Macrophage 2
PSME2	3.01e-197	6.06e-193	0.383119	0.951	0.774	1	Macrophage 2
CSF3R	1.4e-196	2.82e-192	0.329516	0.514	0.261	1	Macrophage 2
MALAT1	1.23e-194	2.48e-190	-0.426812	1	0.991	1	Macrophage 2
SAMHD1	7.09e-193	1.43e-188	0.33356	0.993	0.805	1	Macrophage 2
EMILIN2	2.35e-192	4.74e-188	0.323184	0.735	0.461	1	Macrophage 2
FAM101B	3.4e-192	6.85e-188	0.31355	0.478	0.207	1	Macrophage 2
TMEM167A	6.08e-192	1.22e-187	0.362559	0.863	0.636	1	Macrophage 2
LPAR6	4.78e-191	9.62e-187	0.374114	0.872	0.597	1	Macrophage 2
TXNIP	6.89e-189	1.39e-184	0.347849	0.998	0.968	1	Macrophage 2
ATP6AP2	1.89e-188	3.81e-184	0.341385	0.912	0.684	1	Macrophage 2
VAMP5	8.85e-188	1.78e-183	0.431108	0.907	0.697	1	Macrophage 2
CFP	6.97e-187	1.4e-182	0.368146	0.701	0.422	1	Macrophage 2
IL32	7.57e-187	1.52e-182	-1.96767	0.025	0.297	1	Macrophage 2
SHTN1	1.41e-186	2.84e-182	0.328727	0.883	0.613	1	Macrophage 2
PID1	2.44e-186	4.92e-182	0.295475	0.375	0.147	1	Macrophage 2
LPCAT2	4.58e-186	9.22e-182	0.329278	0.781	0.51	1	Macrophage 2
SCIMP	3.76e-185	7.57e-181	0.328944	0.786	0.518	1	Macrophage 2
VMP1	1.99e-181	4e-177	0.442015	0.928	0.714	1	Macrophage 2
PDK4	2.59e-181	5.21e-177	0.378698	0.843	0.552	1	Macrophage 2
C1QC	3.19e-181	6.43e-177	-1.09067	0.194	0.464	1	Macrophage 2
FKBP1A	3.54e-181	7.13e-177	0.304793	0.973	0.764	1	Macrophage 2
RRP12	9.64e-181	1.94e-176	0.286074	0.381	0.158	1	Macrophage 2
YBX3	1.91e-180	3.84e-176	0.32353	0.811	0.539	1	Macrophage 2
GNG5	1.01e-179	2.04e-175	0.296973	0.984	0.838	1	Macrophage 2
HINT1	3.34e-178	6.73e-174	-0.482027	0.874	0.886	1	Macrophage 2
2020-03-01	4.52e-178	9.1e-174	0.341893	0.899	0.622	1	Macrophage 2
SLC11A1	7.08e-176	1.43e-171	0.318875	0.727	0.403	1	Macrophage 2
PLXDC2	2.89e-174	5.82e-170	0.349563	0.818	0.556	1	Macrophage 2
BACH1	1.14e-173	2.29e-169	0.357701	0.752	0.496	1	Macrophage 2
MS4A7	5.53e-173	1.11e-168	0.418554	0.897	0.616	1	Macrophage 2
CEBPD	2.01e-172	4.04e-168	0.449922	0.786	0.547	1	Macrophage 2
PEBP1	7.62e-172	1.53e-167	-0.486448	0.476	0.678	1	Macrophage 2
LYN	1.23e-169	2.48e-165	0.331397	0.926	0.66	1	Macrophage 2
ALDOA	2.33e-169	4.69e-165	0.300068	0.965	0.806	1	Macrophage 2
HCK	3.31e-168	6.66e-164	0.308295	0.745	0.495	1	Macrophage 2
TUBA1A	1.13e-167	2.28e-163	0.510419	0.909	0.72	1	Macrophage 2
DPYD	6.8e-167	1.37e-162	0.301238	0.701	0.451	1	Macrophage 2
LRP1	9.03e-167	1.82e-162	0.285232	0.881	0.556	1	Macrophage 2
CST7	1.2e-166	2.42e-162	-0.895052	0.012	0.259	1	Macrophage 2
CTSA	1.24e-165	2.5e-161	0.281618	0.773	0.479	1	Macrophage 2
NCF1	4.13e-165	8.32e-161	0.381866	0.759	0.513	1	Macrophage 2
CCL5	3.29e-164	6.62e-160	-2.50546	0.042	0.293	1	Macrophage 2
ACTB	4.17e-164	8.41e-160	0.265097	1	0.99	1	Macrophage 2
ANPEP	7.13e-164	1.44e-159	0.282057	0.495	0.253	1	Macrophage 2
GNAI2	7.51e-163	1.51e-158	0.269092	0.99	0.86	1	Macrophage 2
SKAP2	4.01e-162	8.08e-158	0.307457	0.937	0.698	1	Macrophage 2
IFI6	1.14e-161	2.29e-157	0.475692	0.737	0.501	1	Macrophage 2
TNFSF13B	5.42e-161	1.09e-156	0.393356	0.748	0.525	1	Macrophage 2
SMCO4	8.44e-161	1.7e-156	0.314024	0.724	0.484	1	Macrophage 2
CD44	8.06e-158	1.62e-153	0.333578	0.95	0.791	1	Macrophage 2
IL2RG	1.07e-157	2.15e-153	-0.756649	0.224	0.479	1	Macrophage 2
CAP1	1.79e-156	3.6e-152	0.280046	0.986	0.841	1	Macrophage 2
PHPT1	2.9e-156	5.85e-152	0.319351	0.907	0.69	1	Macrophage 2
OSCAR	2.92e-156	5.88e-152	0.292924	0.523	0.294	1	Macrophage 2
POLE4	3.87e-156	7.8e-152	0.292454	0.75	0.515	1	Macrophage 2
PDIA3	2.9e-154	5.84e-150	0.320644	0.961	0.778	1	Macrophage 2
PDIA6	7.46e-153	1.5e-148	0.323027	0.92	0.701	1	Macrophage 2
GZMA	3.25e-152	6.55e-148	-1.52582	0.019	0.251	1	Macrophage 2
FCER1G	4.83e-152	9.73e-148	0.320141	0.998	0.752	1	Macrophage 2
CX3CR1	4.92e-151	9.9e-147	0.372073	0.554	0.294	1	Macrophage 2
BLVRB	1.55e-150	3.12e-146	0.269354	0.926	0.649	1	Macrophage 2
NUP214	6.84e-150	1.38e-145	0.279931	0.712	0.473	1	Macrophage 2
SAT1	1.65e-148	3.33e-144	0.320461	0.984	0.788	1	Macrophage 2
HNMT	1.1e-147	2.21e-143	0.27842	0.876	0.589	1	Macrophage 2
ACTR3	5.11e-147	1.03e-142	0.283509	0.985	0.853	1	Macrophage 2
PLEKHO1	9.18e-147	1.85e-142	0.310548	0.897	0.665	1	Macrophage 2
AES	1.54e-145	3.1e-141	-0.485651	0.667	0.796	1	Macrophage 2
C10orf54	3.53e-144	7.12e-140	0.294371	0.592	0.358	1	Macrophage 2
LRRK2	7.97e-144	1.61e-139	0.328605	0.447	0.237	1	Macrophage 2
SPTSSA	1.22e-143	2.45e-139	0.266889	0.585	0.358	1	Macrophage 2
PRELID1	1.82e-143	3.66e-139	0.300507	0.942	0.783	1	Macrophage 2
TCIRG1	1.85e-143	3.73e-139	0.265288	0.721	0.47	1	Macrophage 2
MSN	8.44e-143	1.7e-138	0.264921	0.98	0.868	1	Macrophage 2
TMEM30A	3.26e-142	6.56e-138	0.303486	0.736	0.498	1	Macrophage 2
GPBAR1	3.25e-141	6.54e-137	0.270134	0.477	0.257	1	Macrophage 2
A2M	4.95e-141	9.98e-137	-0.563436	0.299	0.526	1	Macrophage 2
IL17RA	1.43e-140	2.87e-136	0.292588	0.7	0.471	1	Macrophage 2
LAMTOR4	3.76e-140	7.57e-136	0.26087	0.957	0.798	1	Macrophage 2
DSE	9.64e-140	1.94e-135	0.361185	0.716	0.5	1	Macrophage 2
REEP5	5.59e-138	1.13e-133	0.280562	0.895	0.702	1	Macrophage 2
TLR7	2.04e-137	4.11e-133	0.250694	0.459	0.244	1	Macrophage 2
LMO2	2.76e-137	5.56e-133	0.278177	0.857	0.602	1	Macrophage 2
ZNF106	7.99e-137	1.61e-132	0.290955	0.853	0.641	1	Macrophage 2
CD55	1.16e-136	2.34e-132	0.325159	0.756	0.531	1	Macrophage 2
MAP3K8	4.23e-136	8.52e-132	0.307471	0.788	0.56	1	Macrophage 2
CALR	9.99e-136	2.01e-131	0.295263	0.973	0.796	1	Macrophage 2
ADAP2	3.54e-135	7.14e-131	0.275528	0.886	0.592	1	Macrophage 2
NOTCH2	8.34e-135	1.68e-130	0.260598	0.641	0.408	1	Macrophage 2
DDX60L	1.01e-134	2.03e-130	0.272765	0.725	0.488	1	Macrophage 2
LYST	3.89e-134	7.84e-130	0.285651	0.633	0.407	1	Macrophage 2
THEMIS2	4.54e-134	9.14e-130	0.255288	0.696	0.461	1	Macrophage 2
WARS	9.81e-134	1.98e-129	0.36825	0.686	0.454	1	Macrophage 2
PGAM1	1.55e-133	3.12e-129	0.267634	0.813	0.597	1	Macrophage 2
NKG7	8.96e-133	1.8e-128	-1.7049	0.051	0.268	1	Macrophage 2
DYNLT1	3.47e-132	6.98e-128	0.261987	0.843	0.61	1	Macrophage 2
IRAK3	1.48e-131	2.98e-127	0.277473	0.445	0.242	1	Macrophage 2
RPS29	1.54e-131	3.1e-127	-0.373644	0.998	0.986	1	Macrophage 2
CASP1	5.07e-131	1.02e-126	0.288193	0.702	0.489	1	Macrophage 2
CCND1	1.11e-130	2.23e-126	-0.414539	0.133	0.374	1	Macrophage 2
DICER1	1.37e-130	2.76e-126	0.260315	0.799	0.553	1	Macrophage 2
COX5B	3.77e-129	7.59e-125	0.254309	0.964	0.83	1	Macrophage 2
C1QA	5.05e-129	1.02e-124	-1.1205	0.412	0.575	1	Macrophage 2
WDR11	9.15e-129	1.84e-124	0.266418	0.617	0.397	1	Macrophage 2
FCER1A	6.16e-128	1.24e-123	-1.27584	0.053	0.264	1	Macrophage 2
CD302	8.73e-128	1.76e-123	0.269419	0.774	0.546	1	Macrophage 2
CARD16	1.67e-127	3.36e-123	0.289098	0.834	0.638	1	Macrophage 2
RNASE2	4.62e-127	9.3e-123	0.308307	0.433	0.22	1	Macrophage 2
LAP3	2.58e-126	5.19e-122	0.312449	0.926	0.692	1	Macrophage 2
BST2	2.26e-125	4.55e-121	0.289573	0.92	0.726	1	Macrophage 2
IFITM3	3.08e-125	6.2e-121	0.267966	0.907	0.66	1	Macrophage 2
METTL7A	3.21e-124	6.46e-120	0.251907	0.659	0.424	1	Macrophage 2
STK17A	6.76e-124	1.36e-119	-0.776571	0.184	0.406	1	Macrophage 2
CD59	3.31e-122	6.68e-118	-0.331279	0.082	0.305	1	Macrophage 2
FBXL5	3.9e-122	7.85e-118	0.260257	0.705	0.49	1	Macrophage 2
PILRA	5.35e-122	1.08e-117	0.257521	0.605	0.388	1	Macrophage 2
RNF149	1.09e-121	2.2e-117	0.268216	0.75	0.534	1	Macrophage 2
GRN	1.16e-121	2.34e-117	0.269028	0.979	0.708	1	Macrophage 2
CMTM6	1.18e-121	2.37e-117	0.251968	0.932	0.739	1	Macrophage 2
ARRB2	4.66e-121	9.39e-117	0.253737	0.868	0.64	1	Macrophage 2
EMP3	8.8e-121	1.77e-116	0.28208	0.991	0.927	1	Macrophage 2
ATP1B3	2.13e-119	4.29e-115	0.278079	0.83	0.626	1	Macrophage 2
RNASE6	1.39e-118	2.79e-114	0.308615	0.804	0.579	1	Macrophage 2
PYCARD	1.16e-117	2.34e-113	0.25845	0.914	0.717	1	Macrophage 2
SLC16A3	2.4e-117	4.84e-113	0.267795	0.66	0.443	1	Macrophage 2
OLR1	1.2e-116	2.42e-112	0.394282	0.311	0.137	1	Macrophage 2
SCO2	1.28e-116	2.57e-112	0.264137	0.652	0.438	1	Macrophage 2
APOC1	4.33e-116	8.72e-112	-0.697742	0.092	0.307	1	Macrophage 2
SELL	5.61e-116	1.13e-111	0.310541	0.454	0.251	1	Macrophage 2
GLIPR1	1e-115	2.02e-111	0.256269	0.927	0.734	1	Macrophage 2
NUMB	1.17e-115	2.37e-111	0.256181	0.651	0.451	1	Macrophage 2
SLC43A2	1.01e-114	2.04e-110	0.265375	0.58	0.368	1	Macrophage 2
STAT1	1.3e-114	2.62e-110	0.318758	0.843	0.637	1	Macrophage 2
FGR	3.27e-113	6.58e-109	0.268353	0.642	0.435	1	Macrophage 2
BASP1	1.14e-112	2.3e-108	-0.514847	0.25	0.465	1	Macrophage 2
PECAM1	8.8e-111	1.77e-106	0.255251	0.649	0.427	1	Macrophage 2
FAM26F	1.59e-110	3.21e-106	0.287415	0.766	0.549	1	Macrophage 2
NFATC2	5.11e-109	1.03e-104	-0.273472	0.064	0.267	1	Macrophage 2
RRAS	8.78e-109	1.77e-104	0.253371	0.644	0.438	1	Macrophage 2
MYL12A	9.11e-109	1.83e-104	-0.442977	0.945	0.933	1	Macrophage 2
RPS4X	2.94e-108	5.93e-104	-0.385858	0.998	0.984	1	Macrophage 2
LGMN	3e-107	6.04e-103	-0.820935	0.273	0.465	1	Macrophage 2
HSPA5	2.06e-102	4.15e-98	0.298	0.921	0.707	1	Macrophage 2
MPC2	2.7e-102	5.43e-98	-0.359249	0.329	0.525	1	Macrophage 2
GLRX	9.13e-102	1.84e-97	0.258897	0.85	0.672	1	Macrophage 2
BCL2A1	9.91e-102	2e-97	0.276793	0.471	0.281	1	Macrophage 2
MRC1	2.66e-100	5.36e-96	-0.508216	0.31	0.498	1	Macrophage 2
CD226	4.6e-100	9.27e-96	-0.289012	0.087	0.286	1	Macrophage 2
RASA1	6.94e-99	1.4e-94	0.251319	0.543	0.344	1	Macrophage 2
CDKN1A	7.06e-99	1.42e-94	0.300198	0.721	0.516	1	Macrophage 2
LTB	1.96e-98	3.96e-94	-1.44232	0.171	0.36	1	Macrophage 2
LGALS1	1.52e-95	3.05e-91	0.258613	0.979	0.877	1	Macrophage 2
PTMS	3.68e-95	7.4e-91	-0.46336	0.422	0.6	1	Macrophage 2
NPM1	1.05e-93	2.11e-89	-0.321157	0.925	0.913	1	Macrophage 2
CD28	1.82e-93	3.66e-89	-0.316499	0.075	0.258	1	Macrophage 2
RPS21	1.63e-91	3.28e-87	-0.292242	0.992	0.974	1	Macrophage 2
STMN1	2.37e-91	4.78e-87	-0.562123	0.222	0.411	1	Macrophage 2
RPL23A	6.79e-89	1.37e-84	-0.366501	0.992	0.976	1	Macrophage 2
THBD	7.47e-88	1.5e-83	0.289362	0.283	0.136	1	Macrophage 2
GPNMB	1.21e-87	2.44e-83	-0.537448	0.184	0.359	1	Macrophage 2
RPL3	1.27e-86	2.56e-82	-0.35441	0.998	0.981	1	Macrophage 2
MT-ND4L	1.72e-86	3.47e-82	0.259219	0.942	0.803	1	Macrophage 2
RPS15A	3.41e-86	6.86e-82	-0.37825	0.995	0.983	1	Macrophage 2
DDX21	4.92e-84	9.9e-80	0.250258	0.87	0.696	1	Macrophage 2
CALM1	5.65e-84	1.14e-79	-0.295121	0.985	0.965	1	Macrophage 2
SLC39A8	6.28e-83	1.27e-78	0.292724	0.516	0.333	1	Macrophage 2
RPS27	1.07e-82	2.15e-78	-0.377378	0.999	0.989	1	Macrophage 2
GYPC	1.1e-82	2.21e-78	-0.453206	0.311	0.474	1	Macrophage 2
PRKACB	2.21e-81	4.44e-77	-0.35967	0.28	0.463	1	Macrophage 2
MT2A	5.85e-81	1.18e-76	0.344065	0.7	0.519	1	Macrophage 2
TMEM176B	2.79e-77	5.62e-73	0.25365	0.348	0.197	1	Macrophage 2
RPS3	1.95e-74	3.93e-70	-0.412063	0.997	0.978	1	Macrophage 2
UGCG	3.04e-74	6.13e-70	-0.260958	0.127	0.299	1	Macrophage 2
RPS27A	1.62e-73	3.26e-69	-0.298673	0.998	0.987	1	Macrophage 2
MZT2A	6.79e-72	1.37e-67	-0.387819	0.295	0.451	1	Macrophage 2
CCND2	2.01e-70	4.05e-66	-0.359421	0.197	0.362	1	Macrophage 2
BCL2	1.49e-67	3e-63	-0.407694	0.188	0.351	1	Macrophage 2
BIN1	1.64e-67	3.3e-63	-0.258734	0.149	0.314	1	Macrophage 2
EPB41L2	7.62e-67	1.53e-62	-0.308723	0.317	0.474	1	Macrophage 2
CD1C	2.27e-66	4.56e-62	-0.842345	0.124	0.26	1	Macrophage 2
RPL13A	2.34e-66	4.72e-62	-0.266578	0.997	0.986	1	Macrophage 2
RPL5	3.48e-64	7.01e-60	-0.317671	0.987	0.971	1	Macrophage 2
RPSA	1.23e-63	2.48e-59	-0.296478	0.985	0.968	1	Macrophage 2
MBP	1.24e-63	2.5e-59	-0.378278	0.491	0.613	1	Macrophage 2
SOD1	1.14e-62	2.29e-58	-0.316329	0.632	0.71	1	Macrophage 2
CD99	3.22e-61	6.48e-57	-0.37895	0.594	0.69	1	Macrophage 2
RPS7	6.37e-61	1.28e-56	-0.254476	0.996	0.979	1	Macrophage 2
LDHB	7.84e-61	1.58e-56	-0.428635	0.472	0.585	1	Macrophage 2
SLC7A8	1.63e-60	3.28e-56	-0.257595	0.14	0.288	1	Macrophage 2
GBP1	6.02e-60	1.21e-55	0.284733	0.689	0.533	1	Macrophage 2
TSTD1	6.09e-60	1.23e-55	-0.34307	0.135	0.279	1	Macrophage 2
RPL7A	1.98e-59	4e-55	-0.262806	0.994	0.978	1	Macrophage 2
TNFSF10	1.7e-58	3.42e-54	0.31678	0.506	0.363	1	Macrophage 2
ENHO	1.13e-57	2.28e-53	-0.412146	0.173	0.32	1	Macrophage 2
PLTP	3.74e-57	7.53e-53	-0.332529	0.137	0.272	1	Macrophage 2
RPL14	2.44e-56	4.91e-52	-0.281502	0.996	0.975	1	Macrophage 2
DST	9.65e-52	1.94e-47	-0.3328	0.396	0.516	1	Macrophage 2
EVL	1.26e-50	2.53e-46	-0.390218	0.426	0.557	1	Macrophage 2
RPS18	4.91e-49	9.88e-45	-0.258981	1	0.988	1	Macrophage 2
ANKRD12	1.65e-48	3.32e-44	-0.320384	0.778	0.81	1	Macrophage 2
GPR183	3.87e-48	7.8e-44	-0.383621	0.251	0.374	1	Macrophage 2
IER3	4.33e-48	8.71e-44	0.26924	0.579	0.429	1	Macrophage 2
FCGR2B	2.31e-47	4.66e-43	-0.3266	0.318	0.439	1	Macrophage 2
NRP1	1.65e-46	3.32e-42	-0.306828	0.258	0.384	1	Macrophage 2
HLA-DPB1	1.21e-45	2.44e-41	-0.474758	0.991	0.841	1	Macrophage 2
IFIT2	3.01e-44	6.06e-40	0.335672	0.376	0.256	1	Macrophage 2
C12orf57	3.94e-44	7.93e-40	-0.40437	0.261	0.386	1	Macrophage 2
PDCD4	2.34e-43	4.72e-39	-0.423474	0.417	0.528	1	Macrophage 2
ITGA4	3.96e-42	7.97e-38	-0.428183	0.332	0.435	1	Macrophage 2
EMB	8.94e-41	1.8e-36	-0.373627	0.458	0.558	1	Macrophage 2
SLFN5	3.7e-40	7.46e-36	-0.414726	0.34	0.451	1	Macrophage 2
2020-09-06	3.06e-39	6.16e-35	-0.36328	0.513	0.585	1	Macrophage 2
PPDPF	9.4e-39	1.89e-34	-0.28855	0.672	0.717	1	Macrophage 2
IFIT3	4.2e-38	8.46e-34	0.278653	0.439	0.319	1	Macrophage 2
MZT2B	8.54e-38	1.72e-33	-0.255962	0.743	0.761	1	Macrophage 2
RPS14	2.5e-37	5.03e-33	-0.252064	0.999	0.985	1	Macrophage 2
ARPC5L	3.83e-37	7.71e-33	-0.324304	0.331	0.444	1	Macrophage 2
ODF2L	4.88e-37	9.84e-33	-0.29222	0.143	0.252	1	Macrophage 2
IQGAP2	8.04e-37	1.62e-32	-0.265959	0.395	0.504	1	Macrophage 2
ABCA1	1.68e-36	3.39e-32	-0.336481	0.205	0.306	1	Macrophage 2
PSIP1	2.54e-36	5.11e-32	-0.322559	0.238	0.347	1	Macrophage 2
EZR	1.96e-35	3.94e-31	-0.257726	0.678	0.728	1	Macrophage 2
EPB41	7.6e-35	1.53e-30	-0.297597	0.166	0.273	1	Macrophage 2
ISG15	7.73e-35	1.56e-30	0.288674	0.743	0.616	1	Macrophage 2
EIF4A2	5.81e-34	1.17e-29	-0.267177	0.769	0.791	1	Macrophage 2
CLEC2B	8.95e-34	1.8e-29	-0.284666	0.643	0.687	1	Macrophage 2
CDC42SE2	3.9e-33	7.86e-29	-0.32404	0.541	0.617	1	Macrophage 2
DDX24	1.65e-32	3.31e-28	-0.289544	0.77	0.784	1	Macrophage 2
ARHGAP15	2.01e-32	4.06e-28	-0.274781	0.236	0.343	1	Macrophage 2
COLEC12	1.83e-31	3.69e-27	-0.266088	0.208	0.306	1	Macrophage 2
JAK1	1.9e-29	3.82e-25	-0.274672	0.79	0.793	1	Macrophage 2
STK4	8.86e-29	1.78e-24	-0.298117	0.781	0.787	1	Macrophage 2
IFITM2	1.7e-28	3.42e-24	-0.458409	0.722	0.725	1	Macrophage 2
KIF2A	8.99e-28	1.81e-23	-0.301593	0.281	0.375	1	Macrophage 2
GCC2	4.61e-27	9.28e-23	-0.31494	0.518	0.589	1	Macrophage 2
EMP1	3.95e-26	7.95e-22	-0.290179	0.295	0.383	1	Macrophage 2
PTPN22	8.78e-26	1.77e-21	-0.257757	0.272	0.368	1	Macrophage 2
KMT2A	1.92e-25	3.87e-21	-0.318351	0.391	0.475	1	Macrophage 2
N4BP2L2	4.74e-24	9.55e-20	-0.252702	0.843	0.836	1	Macrophage 2
SYNE1	7.8e-24	1.57e-19	-0.290965	0.192	0.277	1	Macrophage 2
GLTSCR2	8.75e-23	1.76e-18	-0.273543	0.715	0.729	1	Macrophage 2
YPEL3	2.15e-22	4.33e-18	-0.302762	0.244	0.324	1	Macrophage 2
JUN	5.46e-22	1.1e-17	-0.330339	0.449	0.529	1	Macrophage 2
ARGLU1	3.28e-21	6.61e-17	-0.264232	0.703	0.716	1	Macrophage 2
LMNA	7.54e-21	1.52e-16	-0.251762	0.354	0.436	1	Macrophage 2
2020-09-07	6.79e-20	1.37e-15	-0.272472	0.906	0.88	1	Macrophage 2
PLP2	9.99e-20	2.01e-15	-0.282696	0.328	0.396	1	Macrophage 2
DUT	2.45e-19	4.93e-15	-0.272534	0.427	0.491	1	Macrophage 2
RNASE1	1.37e-17	2.77e-13	-0.794869	0.553	0.507	1	Macrophage 2
VAMP2	4.64e-15	9.34e-11	-0.269674	0.46	0.511	1	Macrophage 2
APOBEC3G	9.71e-15	1.96e-10	-0.366212	0.342	0.401	1	Macrophage 2
AP000769.1	1.78e-13	3.59e-09	-0.26605	0.325	0.376	1	Macrophage 2
HIST1H4C	2.02e-11	4.07e-07	-0.316823	0.437	0.476	1	Macrophage 2
HLA-DQB1	1.71e-09	3.44e-05	-0.513434	0.948	0.714	1	Macrophage 2
FAM65B	1.56e-08	0.000313579	-0.295921	0.301	0.334	1	Macrophage 2
TRAF3IP3	6.74e-07	0.0135687	-0.320233	0.365	0.383	1	Macrophage 2
LYVE1	2.06e-06	0.041572	-0.344722	0.441	0.434	1	Macrophage 2
MAF	2.93e-06	0.0590041	-0.309482	0.655	0.567	1	Macrophage 2
LYAR	3.32e-06	0.0669401	-0.273885	0.39	0.416	1	Macrophage 2
PPP2R5C	4.63e-06	0.0932443	-0.270581	0.56	0.572	1	Macrophage 2
CMC1	1.03e-05	0.206671	-0.398277	0.366	0.4	1	Macrophage 2
HMGB2	2.56e-05	0.514962	-0.322289	0.397	0.41	1	Macrophage 2
DAB2	0.000118825	1	-0.612702	0.718	0.569	1	Macrophage 2
GIMAP7	0.000152948	1	-0.258446	0.626	0.538	1	Macrophage 2
HLA-DQA1	0.000911303	1	-0.687458	0.905	0.717	1	Macrophage 2
CKLF	0.00111915	1	-0.282934	0.726	0.649	1	Macrophage 2
CTSL	0.00571644	1	-0.840888	0.839	0.622	1	Macrophage 2
RARRES3	0.00595306	1	-0.310071	0.569	0.553	1	Macrophage 2
FCER1A	0	0	2.17072	0.958	0.148	2	Dendritic cell 1
CD1C	0	0	1.74895	0.956	0.156	2	Dendritic cell 1
HLA-DPB1	0	0	1.74155	0.995	0.847	2	Dendritic cell 1
HLA-DQA1	0	0	1.68953	0.998	0.714	2	Dendritic cell 1
HLA-DQB1	0	0	1.60809	0.998	0.718	2	Dendritic cell 1
HLA-DPA1	0	0	1.45463	0.997	0.847	2	Dendritic cell 1
HLA-DRA	0	0	1.38564	0.996	0.86	2	Dendritic cell 1
HLA-DRB1	0	0	1.35209	0.996	0.838	2	Dendritic cell 1
CST3	0	0	1.34005	0.995	0.802	2	Dendritic cell 1
CLEC10A	0	0	1.22931	0.963	0.595	2	Dendritic cell 1
CD1E	0	0	1.16499	0.72	0.063	2	Dendritic cell 1
LGALS2	0	0	1.15341	0.777	0.144	2	Dendritic cell 1
HLA-DRB5	0	0	1.03081	0.992	0.759	2	Dendritic cell 1
CD74	0	0	0.997215	0.999	0.891	2	Dendritic cell 1
HLA-DMA	0	0	0.986038	0.982	0.685	2	Dendritic cell 1
RP11-404O13.5	0	0	0.965717	0.657	0.096	2	Dendritic cell 1
BASP1	0	0	0.952753	0.895	0.379	2	Dendritic cell 1
JAML	0	0	0.879076	0.94	0.415	2	Dendritic cell 1
ENHO	0	0	0.871218	0.758	0.245	2	Dendritic cell 1
PKIB	0	0	0.859395	0.739	0.158	2	Dendritic cell 1
FCGR2B	0	0	0.827029	0.851	0.371	2	Dendritic cell 1
MS4A6A	0	0	0.818503	0.946	0.707	2	Dendritic cell 1
CPVL	0	0	0.805786	0.87	0.621	2	Dendritic cell 1
GPAT3	0	0	0.736666	0.754	0.173	2	Dendritic cell 1
CD72	0	0	0.73041	0.693	0.092	2	Dendritic cell 1
HLA-DMB	0	0	0.730193	0.972	0.623	2	Dendritic cell 1
IGSF6	0	0	0.694653	0.91	0.522	2	Dendritic cell 1
ARL4C	0	0	0.68106	0.967	0.675	2	Dendritic cell 1
ITGAX	0	0	0.67818	0.794	0.27	2	Dendritic cell 1
LSP1	0	0	0.668897	0.946	0.51	2	Dendritic cell 1
CKLF	0	0	0.666908	0.923	0.629	2	Dendritic cell 1
RP6-159A1.4	0	0	0.664638	0.736	0.267	2	Dendritic cell 1
PHACTR1	0	0	0.663736	0.731	0.235	2	Dendritic cell 1
RPS23	0	0	0.659733	0.99	0.987	2	Dendritic cell 1
SPINT2	0	0	0.63923	0.858	0.37	2	Dendritic cell 1
CD1D	0	0	0.624568	0.726	0.198	2	Dendritic cell 1
RPS11	0	0	0.624326	0.989	0.984	2	Dendritic cell 1
RPL26	0	0	0.62393	0.992	0.986	2	Dendritic cell 1
RPS13	0	0	0.615148	0.99	0.981	2	Dendritic cell 1
CCDC50	0	0	0.608975	0.844	0.416	2	Dendritic cell 1
PAK1	0	0	0.607781	0.873	0.489	2	Dendritic cell 1
RPS9	0	0	0.603318	0.99	0.982	2	Dendritic cell 1
BTG2	0	0	0.601653	0.819	0.432	2	Dendritic cell 1
CIITA	0	0	0.599533	0.665	0.185	2	Dendritic cell 1
GAPT	0	0	0.591033	0.76	0.301	2	Dendritic cell 1
RPL15	0	0	0.577058	0.989	0.984	2	Dendritic cell 1
RPL37	0	0	0.575667	0.99	0.986	2	Dendritic cell 1
FGL2	0	0	0.574373	0.982	0.675	2	Dendritic cell 1
P2RY14	0	0	0.573055	0.573	0.049	2	Dendritic cell 1
ENTPD1	0	0	0.567376	0.747	0.352	2	Dendritic cell 1
RGS10	0	0	0.566234	0.934	0.599	2	Dendritic cell 1
RPS3A	0	0	0.560556	0.991	0.987	2	Dendritic cell 1
HLA-DOA	0	0	0.55137	0.684	0.207	2	Dendritic cell 1
EEF1B2	0	0	0.550474	0.984	0.957	2	Dendritic cell 1
RPS24	0	0	0.548809	0.995	0.991	2	Dendritic cell 1
RPS14	0	0	0.541715	0.989	0.987	2	Dendritic cell 1
PLD4	0	0	0.539196	0.574	0.086	2	Dendritic cell 1
AFF3	0	0	0.536849	0.593	0.127	2	Dendritic cell 1
LINC00936	0	0	0.533348	0.545	0.157	2	Dendritic cell 1
RPS4X	0	0	0.531874	0.99	0.986	2	Dendritic cell 1
TMEM14C	0	0	0.531599	0.886	0.512	2	Dendritic cell 1
RPL18A	0	0	0.530846	0.988	0.985	2	Dendritic cell 1
RPS8	0	0	0.529676	0.99	0.988	2	Dendritic cell 1
RPS2	0	0	0.528152	0.991	0.988	2	Dendritic cell 1
RPL18	0	0	0.520858	0.989	0.981	2	Dendritic cell 1
IL13RA1	0	0	0.518167	0.84	0.48	2	Dendritic cell 1
RPL5	0	0	0.514594	0.988	0.972	2	Dendritic cell 1
RPL11	0	0	0.510675	0.989	0.986	2	Dendritic cell 1
RPS18	0	0	0.508493	0.994	0.989	2	Dendritic cell 1
RPL23	0	0	0.503291	0.985	0.967	2	Dendritic cell 1
RGS18	0	0	0.502296	0.728	0.293	2	Dendritic cell 1
RPL10	0	0	0.498907	0.994	0.992	2	Dendritic cell 1
RAB11FIP1	0	0	0.497922	0.833	0.429	2	Dendritic cell 1
RPL19	0	0	0.496563	0.989	0.984	2	Dendritic cell 1
RPL34	0	0	0.490275	0.99	0.988	2	Dendritic cell 1
RPL6	0	0	0.480678	0.991	0.983	2	Dendritic cell 1
RPS16	0	0	0.478563	0.99	0.984	2	Dendritic cell 1
RPL7A	0	0	0.476193	0.985	0.98	2	Dendritic cell 1
RPL29	0	0	0.474103	0.987	0.98	2	Dendritic cell 1
NDRG2	0	0	0.469786	0.567	0.094	2	Dendritic cell 1
RPL32	0	0	0.460753	0.99	0.989	2	Dendritic cell 1
UVRAG	0	0	0.458539	0.697	0.314	2	Dendritic cell 1
RPL36A	0	0	0.457179	0.982	0.905	2	Dendritic cell 1
RPL8	0	0	0.453875	0.988	0.982	2	Dendritic cell 1
RPL10A	0	0	0.452404	0.985	0.97	2	Dendritic cell 1
RPS7	0	0	0.450208	0.987	0.981	2	Dendritic cell 1
RPL37A	0	0	0.449229	0.991	0.986	2	Dendritic cell 1
CLEC4A	0	0	0.440437	0.586	0.178	2	Dendritic cell 1
RPS5	0	0	0.439929	0.984	0.966	2	Dendritic cell 1
GNB2L1	0	0	0.439526	0.985	0.964	2	Dendritic cell 1
RPL4	0	0	0.439019	0.985	0.928	2	Dendritic cell 1
EEF1A1	0	0	0.435879	0.996	0.994	2	Dendritic cell 1
RPL35A	0	0	0.435599	0.989	0.979	2	Dendritic cell 1
RPL31	0	0	0.434866	0.983	0.947	2	Dendritic cell 1
BATF3	0	0	0.429829	0.53	0.117	2	Dendritic cell 1
RPS6	0	0	0.429452	0.987	0.986	2	Dendritic cell 1
FLT3	0	0	0.426012	0.44	0.038	2	Dendritic cell 1
PALLD	0	0	0.42213	0.517	0.164	2	Dendritic cell 1
RPL22	0	0	0.41897	0.987	0.974	2	Dendritic cell 1
RPS10	0	0	0.415249	0.983	0.966	2	Dendritic cell 1
NET1	0	0	0.413433	0.371	0.072	2	Dendritic cell 1
BTF3	0	0	0.412783	0.983	0.918	2	Dendritic cell 1
NACA	0	0	0.412564	0.986	0.974	2	Dendritic cell 1
RPS15	0	0	0.408739	0.99	0.984	2	Dendritic cell 1
UBA52	0	0	0.407258	0.991	0.985	2	Dendritic cell 1
RPL30	0	0	0.406753	0.991	0.988	2	Dendritic cell 1
PPP1R14A	0	0	0.403706	0.35	0.023	2	Dendritic cell 1
RPL9	0	0	0.402485	0.99	0.986	2	Dendritic cell 1
RPL39	0	0	0.402295	0.992	0.99	2	Dendritic cell 1
DHRS9	0	0	0.398776	0.427	0.091	2	Dendritic cell 1
TPT1	0	0	0.396352	0.994	0.996	2	Dendritic cell 1
RPL36	0	0	0.39268	0.99	0.984	2	Dendritic cell 1
ADAM28	0	0	0.392313	0.467	0.102	2	Dendritic cell 1
RPL24	0	0	0.391554	0.986	0.975	2	Dendritic cell 1
FAU	0	0	0.389443	0.99	0.983	2	Dendritic cell 1
RPL7	0	0	0.385071	0.985	0.975	2	Dendritic cell 1
IL1R2	0	0	0.378405	0.354	0.028	2	Dendritic cell 1
RPL27	0	0	0.374495	0.987	0.976	2	Dendritic cell 1
RPL14	0	0	0.374483	0.988	0.977	2	Dendritic cell 1
RPS21	0	0	0.374304	0.987	0.975	2	Dendritic cell 1
BCL11A	0	0	0.372983	0.386	0.058	2	Dendritic cell 1
RPL41	0	0	0.370075	0.993	0.991	2	Dendritic cell 1
RPL27A	0	0	0.369893	0.989	0.984	2	Dendritic cell 1
MYCL	0	0	0.365628	0.398	0.051	2	Dendritic cell 1
RPS19	0	0	0.364699	0.989	0.989	2	Dendritic cell 1
RPL13	0	0	0.361555	0.994	0.993	2	Dendritic cell 1
RPL12	0	0	0.344335	0.99	0.986	2	Dendritic cell 1
RPS29	0	0	0.343983	0.991	0.987	2	Dendritic cell 1
TLR10	0	0	0.339415	0.337	0.033	2	Dendritic cell 1
TCEA3	0	0	0.337175	0.315	0.04	2	Dendritic cell 1
RPL28	0	0	0.33637	0.991	0.991	2	Dendritic cell 1
RPL21	0	0	0.303032	0.991	0.989	2	Dendritic cell 1
RP11-426C22.5	0	0	0.300913	0.371	0.084	2	Dendritic cell 1
RPS12	0	0	0.299357	0.992	0.99	2	Dendritic cell 1
CLEC4F	0	0	0.298381	0.251	0.013	2	Dendritic cell 1
RPLP1	0	0	0.291823	0.993	0.995	2	Dendritic cell 1
HLA-DOB	0	0	0.284332	0.31	0.026	2	Dendritic cell 1
PARM1	0	0	0.279104	0.303	0.029	2	Dendritic cell 1
IL1R1	0	0	0.269199	0.294	0.038	2	Dendritic cell 1
SPIB	0	0	0.251515	0.265	0.025	2	Dendritic cell 1
HLA-B	0	0	-0.450849	0.994	0.984	2	Dendritic cell 1
MT-ND2	0	0	-0.547366	0.996	0.983	2	Dendritic cell 1
HLA-A	0	0	-0.573216	0.987	0.98	2	Dendritic cell 1
HLA-E	0	0	-0.649287	0.941	0.95	2	Dendritic cell 1
DMXL2	0	0	-0.809002	0.044	0.529	2	Dendritic cell 1
NPL	0	0	-0.855899	0.031	0.508	2	Dendritic cell 1
DRAM1	0	0	-0.871436	0.078	0.547	2	Dendritic cell 1
CALM3	0	0	-0.988824	0.492	0.765	2	Dendritic cell 1
C5AR1	0	0	-1.0655	0.025	0.567	2	Dendritic cell 1
PRDX1	0	0	-1.10573	0.691	0.833	2	Dendritic cell 1
MAF	0	0	-1.2369	0.126	0.634	2	Dendritic cell 1
CD163	0	0	-1.63871	0.182	0.653	2	Dendritic cell 1
CTSD	0	0	-1.67697	0.232	0.722	2	Dendritic cell 1
FCGR3A	0	0	-1.78878	0.217	0.693	2	Dendritic cell 1
CD14	0	0	-1.79372	0.292	0.686	2	Dendritic cell 1
GLUL	0	0	-1.80081	0.395	0.722	2	Dendritic cell 1
MAFB	0	0	-1.83039	0.217	0.687	2	Dendritic cell 1
CTSB	0	0	-1.99662	0.723	0.773	2	Dendritic cell 1
RNASE1	0	0	-2.11935	0.098	0.563	2	Dendritic cell 1
S100A8	0	0	-2.54647	0.222	0.624	2	Dendritic cell 1
S100A9	0	0	-2.72215	0.381	0.741	2	Dendritic cell 1
RTN1	2.53e-307	5.1e-303	0.429926	0.577	0.216	2	Dendritic cell 1
STAB1	6.4e-307	1.29e-302	-0.906059	0.053	0.524	2	Dendritic cell 1
GSTP1	8.89e-307	1.79e-302	0.484551	0.968	0.81	2	Dendritic cell 1
MARCO	3.5e-306	7.05e-302	-1.76731	0.231	0.62	2	Dendritic cell 1
LAMP1	6.93e-306	1.4e-301	-0.807078	0.202	0.626	2	Dendritic cell 1
LAIR1	8.22e-306	1.65e-301	-0.730594	0.092	0.558	2	Dendritic cell 1
RPL13A	4.03e-303	8.11e-299	0.312299	0.989	0.988	2	Dendritic cell 1
SLC25A6	2.27e-300	4.57e-296	0.455984	0.974	0.842	2	Dendritic cell 1
RPL38	3.43e-300	6.91e-296	0.335953	0.985	0.974	2	Dendritic cell 1
SPECC1	4.17e-300	8.4e-296	0.384649	0.55	0.191	2	Dendritic cell 1
PON2	3.48e-297	7.01e-293	0.312186	0.478	0.147	2	Dendritic cell 1
CD84	1.07e-296	2.17e-292	-0.896821	0.452	0.728	2	Dendritic cell 1
SLC11A1	4.43e-296	8.92e-292	-0.768577	0.034	0.498	2	Dendritic cell 1
RPS25	3.7e-295	7.44e-291	0.308536	0.987	0.98	2	Dendritic cell 1
RPLP2	5.36e-292	1.08e-287	0.26709	0.988	0.988	2	Dendritic cell 1
FN1	2.46e-289	4.96e-285	-2.66768	0.121	0.546	2	Dendritic cell 1
RPL23A	6.11e-289	1.23e-284	0.358734	0.984	0.978	2	Dendritic cell 1
CTSL	1.82e-288	3.67e-284	-1.9265	0.404	0.683	2	Dendritic cell 1
NAP1L1	2.24e-287	4.5e-283	0.507198	0.98	0.853	2	Dendritic cell 1
CXorf21	2.55e-286	5.13e-282	0.459801	0.595	0.242	2	Dendritic cell 1
RPL35	7.04e-284	1.42e-279	0.280874	0.988	0.983	2	Dendritic cell 1
PPA1	1.47e-281	2.95e-277	0.506154	0.841	0.467	2	Dendritic cell 1
HSP90AA1	2.28e-280	4.59e-276	-0.586008	0.981	0.965	2	Dendritic cell 1
LYVE1	4.89e-279	9.86e-275	-1.77246	0.041	0.482	2	Dendritic cell 1
RPL3	1.95e-276	3.92e-272	0.31068	0.989	0.983	2	Dendritic cell 1
RPS15A	2.9e-276	5.84e-272	0.338492	0.989	0.984	2	Dendritic cell 1
IRF4	2.07e-274	4.18e-270	0.261548	0.29	0.056	2	Dendritic cell 1
SELL	1.7e-273	3.43e-269	0.352076	0.614	0.24	2	Dendritic cell 1
CACNA2D3	7.17e-273	1.44e-268	0.272342	0.354	0.088	2	Dendritic cell 1
RPS27	2.39e-272	4.82e-268	0.313476	0.992	0.99	2	Dendritic cell 1
PLIN2	4.35e-268	8.77e-264	-0.981421	0.21	0.601	2	Dendritic cell 1
SH3BGRL3	2.27e-266	4.58e-262	-0.42343	0.99	0.98	2	Dendritic cell 1
RAB32	9.24e-264	1.86e-259	0.455315	0.865	0.546	2	Dendritic cell 1
GIMAP4	9.85e-263	1.98e-258	-0.778098	0.467	0.765	2	Dendritic cell 1
CD37	1.57e-260	3.16e-256	0.459734	0.935	0.697	2	Dendritic cell 1
CTSH	2.07e-259	4.17e-255	0.465772	0.942	0.633	2	Dendritic cell 1
DAB2	8.98e-259	1.81e-254	-1.44024	0.304	0.624	2	Dendritic cell 1
EIF3E	1.56e-253	3.14e-249	0.43154	0.958	0.809	2	Dendritic cell 1
HDAC9	7.29e-253	1.47e-248	0.398187	0.658	0.301	2	Dendritic cell 1
C1QC	1.27e-252	2.56e-248	-1.50186	0.06	0.469	2	Dendritic cell 1
SCARB2	6.11e-252	1.23e-247	-0.745714	0.188	0.573	2	Dendritic cell 1
CD36	6.65e-250	1.34e-245	-1.01056	0.108	0.514	2	Dendritic cell 1
KCNK6	1.59e-249	3.2e-245	0.468807	0.735	0.389	2	Dendritic cell 1
TUBB	2.56e-249	5.15e-245	-0.893556	0.644	0.763	2	Dendritic cell 1
GLIPR1	2.97e-245	5.99e-241	0.443739	0.967	0.737	2	Dendritic cell 1
HACD4	7.41e-245	1.49e-240	0.398937	0.769	0.409	2	Dendritic cell 1
FABP5	5.18e-244	1.04e-239	-1.57858	0.514	0.709	2	Dendritic cell 1
PRCP	5.84e-242	1.18e-237	0.409706	0.768	0.421	2	Dendritic cell 1
GIMAP7	1.16e-241	2.34e-237	-0.896706	0.199	0.592	2	Dendritic cell 1
SAMSN1	3e-240	6.03e-236	-0.655567	0.14	0.535	2	Dendritic cell 1
SNX6	7.83e-240	1.58e-235	-0.655771	0.749	0.811	2	Dendritic cell 1
FAM26F	8.82e-240	1.78e-235	0.488636	0.875	0.545	2	Dendritic cell 1
LIPA	1.2e-238	2.42e-234	-1.0669	0.477	0.68	2	Dendritic cell 1
CALR	1.98e-237	3.99e-233	-0.814259	0.792	0.825	2	Dendritic cell 1
EVI2B	8.46e-237	1.7e-232	0.448201	0.949	0.723	2	Dendritic cell 1
IFITM3	5.33e-236	1.07e-231	0.66626	0.916	0.669	2	Dendritic cell 1
SMAP2	6.07e-236	1.22e-231	0.442645	0.898	0.612	2	Dendritic cell 1
LAPTM5	1.27e-234	2.57e-230	-0.621923	0.928	0.864	2	Dendritic cell 1
PLEKHO1	1.17e-233	2.35e-229	0.442975	0.942	0.67	2	Dendritic cell 1
FILIP1L	3.19e-233	6.42e-229	0.313871	0.387	0.118	2	Dendritic cell 1
LY86	2.11e-230	4.24e-226	0.419089	0.785	0.461	2	Dendritic cell 1
TBC1D9	4.98e-230	1e-225	0.370338	0.569	0.249	2	Dendritic cell 1
CTSA	8.35e-229	1.68e-224	-0.609581	0.188	0.561	2	Dendritic cell 1
TMEM154	1.23e-228	2.47e-224	0.287292	0.539	0.211	2	Dendritic cell 1
ACSL1	2.21e-225	4.45e-221	-0.667119	0.07	0.462	2	Dendritic cell 1
NRP1	3.36e-225	6.76e-221	-0.67589	0.021	0.407	2	Dendritic cell 1
SIGLEC1	3.44e-225	6.93e-221	-0.634652	0.067	0.455	2	Dendritic cell 1
TREM2	3.63e-225	7.3e-221	-0.635459	0.035	0.426	2	Dendritic cell 1
BTN2A2	4.04e-225	8.14e-221	0.256988	0.388	0.121	2	Dendritic cell 1
EMP3	4.09e-225	8.24e-221	-0.688097	0.956	0.934	2	Dendritic cell 1
SESN3	1.31e-223	2.65e-219	0.387092	0.714	0.369	2	Dendritic cell 1
CD81	1.47e-223	2.95e-219	-0.656021	0.509	0.758	2	Dendritic cell 1
EIF3L	2.12e-223	4.28e-219	0.428843	0.909	0.655	2	Dendritic cell 1
GPR183	2.34e-220	4.72e-216	0.451973	0.689	0.317	2	Dendritic cell 1
CREG1	1.01e-219	2.04e-215	-0.772589	0.239	0.572	2	Dendritic cell 1
RGS2	4.22e-219	8.5e-215	0.320792	0.553	0.226	2	Dendritic cell 1
P2RY6	1.37e-217	2.76e-213	0.270875	0.424	0.147	2	Dendritic cell 1
HINT1	7.68e-217	1.55e-212	0.345676	0.969	0.874	2	Dendritic cell 1
FTL	1.08e-216	2.18e-212	-1.46586	0.999	0.998	2	Dendritic cell 1
RPS3	5.05e-216	1.02e-211	0.267927	0.987	0.98	2	Dendritic cell 1
PSAP	7.35e-216	1.48e-211	-1.28336	0.959	0.81	2	Dendritic cell 1
MPP1	1.07e-214	2.16e-210	-0.68918	0.161	0.521	2	Dendritic cell 1
GNS	1.29e-214	2.59e-210	-0.618845	0.227	0.572	2	Dendritic cell 1
CFD	2.46e-214	4.95e-210	-1.09087	0.312	0.615	2	Dendritic cell 1
CLECL1	5.34e-214	1.08e-209	0.361278	0.581	0.269	2	Dendritic cell 1
TCF4	1.15e-212	2.31e-208	0.365702	0.659	0.325	2	Dendritic cell 1
ATP2B1	1.34e-212	2.7e-208	0.495532	0.868	0.594	2	Dendritic cell 1
HSPA5	6.38e-212	1.29e-207	-0.91431	0.598	0.754	2	Dendritic cell 1
POLR2L	5.95e-211	1.2e-206	-0.525694	0.814	0.842	2	Dendritic cell 1
ZFAS1	2.47e-210	4.98e-206	0.395171	0.91	0.663	2	Dendritic cell 1
C1QA	4.65e-208	9.37e-204	-1.87844	0.296	0.582	2	Dendritic cell 1
CD48	5.5e-208	1.11e-203	0.342487	0.948	0.735	2	Dendritic cell 1
FAM129A	7.86e-208	1.58e-203	0.400856	0.758	0.407	2	Dendritic cell 1
CCDC6	1.02e-206	2.06e-202	0.374742	0.654	0.344	2	Dendritic cell 1
TMBIM6	7.88e-206	1.59e-201	-0.438018	0.929	0.882	2	Dendritic cell 1
NINJ1	9.8e-206	1.97e-201	-0.499291	0.049	0.418	2	Dendritic cell 1
SLC8A1	2.39e-205	4.82e-201	0.456033	0.858	0.564	2	Dendritic cell 1
SLCO2B1	2.28e-204	4.58e-200	-0.511845	0.013	0.374	2	Dendritic cell 1
IFITM2	4.83e-204	9.73e-200	0.415359	0.911	0.703	2	Dendritic cell 1
PRNP	1.05e-203	2.12e-199	-0.629102	0.221	0.556	2	Dendritic cell 1
GPNMB	6.21e-203	1.25e-198	-0.754732	0.013	0.372	2	Dendritic cell 1
CX3CR1	1.33e-202	2.67e-198	0.260249	0.667	0.292	2	Dendritic cell 1
LMNA	2.29e-202	4.61e-198	-0.685142	0.094	0.463	2	Dendritic cell 1
GNPTAB	5.13e-202	1.03e-197	-0.604718	0.276	0.6	2	Dendritic cell 1
GABARAPL2	7.74e-202	1.56e-197	0.387682	0.877	0.631	2	Dendritic cell 1
PNRC1	5.48e-201	1.1e-196	0.34379	0.96	0.776	2	Dendritic cell 1
PTPRE	3.08e-200	6.21e-196	0.461317	0.867	0.587	2	Dendritic cell 1
FOLR2	4.66e-200	9.38e-196	-0.695731	0.081	0.436	2	Dendritic cell 1
SDC3	4.86e-197	9.8e-193	-0.609363	0.016	0.367	2	Dendritic cell 1
FNDC3B	4.89e-197	9.85e-193	-0.526978	0.118	0.478	2	Dendritic cell 1
CEBPB	9.8e-197	1.97e-192	-0.917892	0.757	0.767	2	Dendritic cell 1
ENO1	2.05e-196	4.12e-192	-0.507219	0.861	0.854	2	Dendritic cell 1
CCND2	2.08e-196	4.2e-192	0.305043	0.653	0.301	2	Dendritic cell 1
CYBB	9.45e-195	1.9e-190	-1.24461	0.847	0.721	2	Dendritic cell 1
C1QB	1.57e-194	3.16e-190	-2.05162	0.248	0.536	2	Dendritic cell 1
EML4	1.21e-193	2.43e-189	-0.560006	0.224	0.569	2	Dendritic cell 1
GIMAP1	1.63e-193	3.29e-189	-0.5181	0.088	0.447	2	Dendritic cell 1
CMKLR1	3.65e-191	7.35e-187	-0.43361	0.015	0.359	2	Dendritic cell 1
SLC39A8	7.08e-191	1.43e-186	-0.59515	0.046	0.397	2	Dendritic cell 1
OGFRL1	9.22e-191	1.86e-186	0.411233	0.873	0.584	2	Dendritic cell 1
EIF3F	2e-190	4.04e-186	0.343163	0.93	0.703	2	Dendritic cell 1
CD63	1.12e-189	2.25e-185	-0.571912	0.904	0.873	2	Dendritic cell 1
REL	2.39e-188	4.81e-184	0.3857	0.877	0.592	2	Dendritic cell 1
RPLP0	5.14e-188	1.04e-183	0.268519	0.987	0.956	2	Dendritic cell 1
FMNL2	1.21e-187	2.44e-183	-0.524482	0.098	0.444	2	Dendritic cell 1
KLF6	2.26e-187	4.55e-183	-0.661906	0.79	0.864	2	Dendritic cell 1
AHR	7.71e-187	1.55e-182	0.426819	0.752	0.454	2	Dendritic cell 1
IL18	9.09e-187	1.83e-182	0.392441	0.766	0.46	2	Dendritic cell 1
RHOA	3.18e-186	6.41e-182	-0.427547	0.963	0.903	2	Dendritic cell 1
TTYH3	5.3e-186	1.07e-181	-0.641703	0.198	0.522	2	Dendritic cell 1
MYL6	6.29e-186	1.27e-181	-0.338597	0.974	0.971	2	Dendritic cell 1
LST1	4.73e-185	9.54e-181	0.386492	0.985	0.747	2	Dendritic cell 1
2020-03-01	1.14e-184	2.3e-180	0.416296	0.924	0.631	2	Dendritic cell 1
LHFPL2	1.46e-184	2.94e-180	-0.482283	0.015	0.35	2	Dendritic cell 1
BLVRA	4.55e-184	9.17e-180	-0.509815	0.194	0.526	2	Dendritic cell 1
RPS17	1.19e-183	2.39e-179	0.271804	0.978	0.947	2	Dendritic cell 1
FCGR1A	9.84e-182	1.98e-177	-0.615428	0.202	0.527	2	Dendritic cell 1
GCA	1.68e-181	3.39e-177	0.332292	0.742	0.446	2	Dendritic cell 1
AIG1	3.26e-181	6.56e-177	0.260902	0.436	0.175	2	Dendritic cell 1
LINC01272	6.25e-181	1.26e-176	-0.603318	0.166	0.497	2	Dendritic cell 1
SLC7A7	1.65e-180	3.33e-176	-0.515227	0.172	0.502	2	Dendritic cell 1
CD68	9.8e-180	1.97e-175	-0.948478	0.67	0.7	2	Dendritic cell 1
CD86	5.47e-179	1.1e-174	0.337271	0.694	0.395	2	Dendritic cell 1
MT-ND1	2.08e-178	4.19e-174	-0.275938	0.996	0.984	2	Dendritic cell 1
MKNK1	2.67e-177	5.38e-173	-0.462595	0.152	0.488	2	Dendritic cell 1
ARHGDIA	1.36e-176	2.74e-172	-0.540917	0.585	0.738	2	Dendritic cell 1
DUSP6	2.62e-176	5.28e-172	-0.819006	0.241	0.544	2	Dendritic cell 1
COLEC12	7.67e-174	1.55e-169	-0.538509	0.008	0.326	2	Dendritic cell 1
ITGB2-AS1	3.12e-173	6.28e-169	0.258676	0.43	0.166	2	Dendritic cell 1
ADAP2	5.02e-173	1.01e-168	-0.768512	0.492	0.651	2	Dendritic cell 1
CLTC	1.28e-172	2.57e-168	-0.64685	0.653	0.735	2	Dendritic cell 1
PYGL	1.42e-172	2.87e-168	-0.459898	0.087	0.419	2	Dendritic cell 1
RGL1	4.43e-172	8.92e-168	-0.55302	0.092	0.419	2	Dendritic cell 1
C1orf162	2.73e-170	5.49e-166	0.386978	0.982	0.741	2	Dendritic cell 1
RIN2	1.65e-169	3.33e-165	-0.454551	0.12	0.45	2	Dendritic cell 1
FXYD5	7.43e-168	1.5e-163	0.318939	0.892	0.643	2	Dendritic cell 1
RNASE6	9.01e-168	1.81e-163	0.369323	0.873	0.58	2	Dendritic cell 1
P4HB	3.46e-166	6.97e-162	-0.553682	0.47	0.67	2	Dendritic cell 1
EMP1	4.1e-166	8.26e-162	-0.615954	0.084	0.404	2	Dendritic cell 1
SNX24	7.5e-166	1.51e-161	-0.405885	0.052	0.374	2	Dendritic cell 1
CYP1B1	1.39e-165	2.8e-161	-0.752143	0.018	0.327	2	Dendritic cell 1
C3AR1	2.54e-165	5.12e-161	-0.630544	0.412	0.626	2	Dendritic cell 1
SEC11A	5.45e-164	1.1e-159	0.346776	0.947	0.765	2	Dendritic cell 1
ADAM9	2.2e-163	4.43e-159	-0.444755	0.141	0.462	2	Dendritic cell 1
CD200R1	2.97e-163	5.97e-159	0.275379	0.447	0.189	2	Dendritic cell 1
ABCA1	4.6e-163	9.26e-159	-0.582245	0.018	0.324	2	Dendritic cell 1
CYTIP	3.88e-162	7.81e-158	0.285275	0.776	0.461	2	Dendritic cell 1
RBP7	4.12e-162	8.3e-158	-0.438431	0.007	0.309	2	Dendritic cell 1
HOMER3	4.26e-162	8.57e-158	-0.341269	0.012	0.317	2	Dendritic cell 1
C12orf45	4.56e-162	9.18e-158	0.285607	0.518	0.247	2	Dendritic cell 1
GIMAP6	5.23e-162	1.05e-157	-0.416799	0.068	0.389	2	Dendritic cell 1
PGLS	1.75e-161	3.52e-157	0.347172	0.909	0.693	2	Dendritic cell 1
EHD4	8.62e-161	1.74e-156	-0.55921	0.335	0.591	2	Dendritic cell 1
P2RX4	1.32e-160	2.66e-156	-0.416692	0.118	0.44	2	Dendritic cell 1
KIAA1551	2.56e-160	5.15e-156	-0.663762	0.547	0.742	2	Dendritic cell 1
PDIA3	5.6e-159	1.13e-154	-0.526668	0.804	0.804	2	Dendritic cell 1
EVI2A	1.02e-158	2.05e-154	0.321778	0.728	0.436	2	Dendritic cell 1
CLIP4	3.05e-158	6.15e-154	-0.363229	0.018	0.32	2	Dendritic cell 1
ARHGAP18	9.87e-158	1.99e-153	-0.60342	0.562	0.699	2	Dendritic cell 1
SDCBP	5.91e-157	1.19e-152	-0.629277	0.807	0.768	2	Dendritic cell 1
CYP27A1	1.77e-156	3.56e-152	-0.531232	0.011	0.306	2	Dendritic cell 1
SLC7A8	1.94e-156	3.92e-152	-0.410349	0.005	0.298	2	Dendritic cell 1
TNFRSF1B	3.71e-156	7.48e-152	-0.540234	0.423	0.652	2	Dendritic cell 1
CALM1	6.9e-156	1.39e-151	-0.416806	0.968	0.967	2	Dendritic cell 1
ZFP36L1	1.48e-155	2.97e-151	-0.713279	0.968	0.858	2	Dendritic cell 1
DYNLT1	2.02e-155	4.08e-151	-0.505009	0.466	0.665	2	Dendritic cell 1
EIF3K	2.59e-155	5.22e-151	0.298083	0.962	0.852	2	Dendritic cell 1
BCAT1	2.71e-155	5.46e-151	-0.466494	0.086	0.395	2	Dendritic cell 1
ACP2	3.16e-155	6.37e-151	-0.383608	0.054	0.36	2	Dendritic cell 1
AAK1	4.04e-155	8.15e-151	-0.539978	0.436	0.679	2	Dendritic cell 1
GLMP	4.34e-155	8.73e-151	-0.394491	0.068	0.375	2	Dendritic cell 1
EPB41L3	4.34e-154	8.74e-150	-0.505997	0.253	0.539	2	Dendritic cell 1
ASAH1	4.64e-153	9.34e-149	-0.697675	0.409	0.61	2	Dendritic cell 1
NPM1	9.99e-153	2.01e-148	0.274715	0.97	0.908	2	Dendritic cell 1
DAPP1	1.52e-152	3.07e-148	0.308896	0.681	0.397	2	Dendritic cell 1
FCER1G	1.93e-152	3.9e-148	0.386606	0.971	0.766	2	Dendritic cell 1
NRP2	3.82e-152	7.69e-148	-0.377926	0.019	0.312	2	Dendritic cell 1
FAM105A	1.86e-151	3.75e-147	0.333967	0.714	0.449	2	Dendritic cell 1
ALDH1A1	2.44e-151	4.92e-147	-0.568556	0.016	0.304	2	Dendritic cell 1
RASA1	8.68e-150	1.75e-145	-0.423847	0.099	0.405	2	Dendritic cell 1
RAPH1	2.89e-149	5.82e-145	-0.448478	0.156	0.466	2	Dendritic cell 1
LILRB5	2.97e-149	5.97e-145	-0.455317	0.016	0.302	2	Dendritic cell 1
MARCKS	4.8e-149	9.67e-145	-1.00579	0.83	0.731	2	Dendritic cell 1
DNAJC4	2.94e-148	5.93e-144	0.250072	0.483	0.229	2	Dendritic cell 1
ATP1B1	1.22e-147	2.46e-143	0.337238	0.748	0.452	2	Dendritic cell 1
HSP90B1	2.04e-147	4.12e-143	-0.588108	0.882	0.844	2	Dendritic cell 1
CFP	2.36e-147	4.76e-143	0.361844	0.721	0.432	2	Dendritic cell 1
CLTA	6.02e-147	1.21e-142	-0.481643	0.874	0.806	2	Dendritic cell 1
GDI2	2.03e-146	4.09e-142	0.336948	0.925	0.72	2	Dendritic cell 1
PDIA6	3.06e-146	6.16e-142	-0.549817	0.671	0.739	2	Dendritic cell 1
GNPDA1	6.86e-145	1.38e-140	-0.475218	0.19	0.478	2	Dendritic cell 1
PTRHD1	1.35e-143	2.72e-139	0.265001	0.576	0.312	2	Dendritic cell 1
DAZAP2	1.81e-143	3.64e-139	-0.446137	0.784	0.804	2	Dendritic cell 1
FLNA	2.02e-142	4.08e-138	-0.520938	0.635	0.741	2	Dendritic cell 1
COMMD6	2.27e-142	4.58e-138	0.265294	0.968	0.9	2	Dendritic cell 1
BLVRB	3.3e-142	6.65e-138	-0.826946	0.66	0.692	2	Dendritic cell 1
JUNB	3.49e-142	7.02e-138	0.351908	0.98	0.83	2	Dendritic cell 1
C2	3.5e-142	7.05e-138	-0.487374	0.011	0.284	2	Dendritic cell 1
TPD52L2	1.08e-141	2.18e-137	-0.364904	0.123	0.424	2	Dendritic cell 1
PTGES3	2.24e-141	4.52e-137	-0.384484	0.866	0.859	2	Dendritic cell 1
PLTP	2.16e-140	4.35e-136	-0.455349	0.011	0.281	2	Dendritic cell 1
TPST2	2.78e-140	5.6e-136	-0.414133	0.202	0.497	2	Dendritic cell 1
ATP5G2	7.47e-140	1.5e-135	0.259441	0.974	0.894	2	Dendritic cell 1
CHST15	1.63e-139	3.29e-135	-0.404343	0.119	0.414	2	Dendritic cell 1
CANX	9.74e-139	1.96e-134	-0.501588	0.738	0.756	2	Dendritic cell 1
RNASE2	1.27e-138	2.55e-134	-0.39655	0.011	0.279	2	Dendritic cell 1
CD302	1.47e-137	2.97e-133	0.312364	0.825	0.55	2	Dendritic cell 1
ANKRD44	8.38e-137	1.69e-132	0.262534	0.786	0.512	2	Dendritic cell 1
TCEB2	2.73e-136	5.5e-132	-0.347774	0.926	0.888	2	Dendritic cell 1
BRI3	3.6e-136	7.26e-132	-0.59643	0.942	0.798	2	Dendritic cell 1
B2M	7.08e-135	1.43e-130	-0.278661	0.999	0.998	2	Dendritic cell 1
RBMS1	3e-134	6.05e-130	-0.49193	0.472	0.668	2	Dendritic cell 1
SAMHD1	4.93e-134	9.93e-130	0.333921	0.992	0.813	2	Dendritic cell 1
IL32	9e-134	1.81e-129	-1.92813	0.024	0.286	2	Dendritic cell 1
COLGALT1	1.78e-133	3.59e-129	-0.401931	0.205	0.484	2	Dendritic cell 1
CAB39	1.88e-133	3.78e-129	-0.508302	0.489	0.663	2	Dendritic cell 1
LRP1	1.54e-132	3.11e-128	-0.555741	0.452	0.621	2	Dendritic cell 1
IQGAP1	3.69e-132	7.44e-128	-0.411744	0.896	0.846	2	Dendritic cell 1
ARAP2	1.13e-131	2.28e-127	-0.482291	0.217	0.497	2	Dendritic cell 1
FAM107B	1.53e-131	3.08e-127	-0.566629	0.308	0.581	2	Dendritic cell 1
TPM3	2.2e-131	4.44e-127	-0.348308	0.972	0.936	2	Dendritic cell 1
ENG	2.51e-131	5.06e-127	-0.459012	0.183	0.458	2	Dendritic cell 1
MGLL	1.32e-130	2.66e-126	-0.361461	0.028	0.293	2	Dendritic cell 1
SGMS1	2.26e-130	4.56e-126	-0.332457	0.079	0.36	2	Dendritic cell 1
EIF3H	9.89e-130	1.99e-125	0.280338	0.927	0.745	2	Dendritic cell 1
ZNF385A	2.99e-129	6.02e-125	0.263274	0.617	0.355	2	Dendritic cell 1
CD28	4.17e-129	8.4e-125	-0.394511	0.006	0.259	2	Dendritic cell 1
ANXA4	1.14e-128	2.3e-124	-0.586298	0.415	0.605	2	Dendritic cell 1
PAG1	2.95e-127	5.95e-123	-0.482719	0.154	0.433	2	Dendritic cell 1
TGM2	3.96e-127	7.97e-123	-0.399357	0.075	0.347	2	Dendritic cell 1
RAB10	5.32e-127	1.07e-122	-0.489473	0.644	0.706	2	Dendritic cell 1
APOL6	1e-126	2.02e-122	-0.504844	0.413	0.623	2	Dendritic cell 1
TUBA1C	5.51e-126	1.11e-121	-0.536071	0.326	0.553	2	Dendritic cell 1
EIF4G2	6.15e-126	1.24e-121	-0.388626	0.874	0.834	2	Dendritic cell 1
GSTO1	1.13e-125	2.28e-121	-0.462176	0.782	0.762	2	Dendritic cell 1
SPATA13	4.45e-125	8.96e-121	-0.371037	0.044	0.305	2	Dendritic cell 1
VAMP5	6.79e-125	1.37e-120	-0.623824	0.697	0.73	2	Dendritic cell 1
CSF2RA	8.47e-125	1.71e-120	0.270486	0.529	0.292	2	Dendritic cell 1
GPR65	1.73e-124	3.48e-120	-0.516985	0.534	0.672	2	Dendritic cell 1
AP2A2	2.53e-124	5.09e-120	-0.462144	0.236	0.494	2	Dendritic cell 1
CAPZA1	6.36e-124	1.28e-119	-0.398991	0.803	0.8	2	Dendritic cell 1
PIM1	7.24e-124	1.46e-119	-0.563258	0.102	0.371	2	Dendritic cell 1
MCOLN1	9.08e-124	1.83e-119	-0.391789	0.172	0.445	2	Dendritic cell 1
GUK1	1.09e-123	2.2e-119	-0.374665	0.833	0.846	2	Dendritic cell 1
HK3	1.11e-123	2.25e-119	-0.282909	0.031	0.288	2	Dendritic cell 1
NLN	1.03e-122	2.08e-118	-0.318972	0.08	0.35	2	Dendritic cell 1
VCAN	1.68e-122	3.38e-118	-1.0386	0.072	0.338	2	Dendritic cell 1
DNASE2	8.13e-122	1.64e-117	-0.29835	0.016	0.261	2	Dendritic cell 1
MERTK	1.06e-121	2.13e-117	-0.277411	0.01	0.252	2	Dendritic cell 1
HMOX1	4.06e-121	8.18e-117	-0.904539	0.485	0.623	2	Dendritic cell 1
BMP2K	2.17e-120	4.38e-116	-0.555309	0.399	0.593	2	Dendritic cell 1
ARF1	8.13e-120	1.64e-115	-0.396512	0.694	0.759	2	Dendritic cell 1
LGMN	1.4e-119	2.83e-115	-0.984009	0.233	0.462	2	Dendritic cell 1
MOB1A	1.22e-118	2.46e-114	-0.405555	0.857	0.794	2	Dendritic cell 1
CD44	2.39e-118	4.82e-114	-0.44941	0.81	0.814	2	Dendritic cell 1
TSPAN14	2.55e-118	5.14e-114	-0.415316	0.224	0.482	2	Dendritic cell 1
SMIM3	4.79e-118	9.64e-114	-0.298977	0.024	0.267	2	Dendritic cell 1
TLR4	7.94e-118	1.6e-113	-0.369146	0.185	0.449	2	Dendritic cell 1
SPRED1	9.9e-118	1.99e-113	-0.435355	0.198	0.457	2	Dendritic cell 1
RPN1	1.12e-117	2.25e-113	-0.424646	0.387	0.598	2	Dendritic cell 1
STOM	1.19e-117	2.39e-113	-0.431486	0.314	0.552	2	Dendritic cell 1
CYFIP1	2.7e-117	5.45e-113	-0.523618	0.414	0.588	2	Dendritic cell 1
HPCAL1	8.86e-117	1.78e-112	-0.355482	0.157	0.426	2	Dendritic cell 1
PLA2G15	9.3e-117	1.87e-112	-0.285816	0.069	0.329	2	Dendritic cell 1
SGTB	1.24e-116	2.49e-112	-0.332286	0.1	0.364	2	Dendritic cell 1
ACTR3	1.34e-116	2.7e-112	-0.372427	0.932	0.865	2	Dendritic cell 1
LTA4H	4.89e-116	9.85e-112	-0.727522	0.563	0.651	2	Dendritic cell 1
MIS18BP1	5.3e-116	1.07e-111	0.312008	0.798	0.557	2	Dendritic cell 1
ELOVL5	1.12e-115	2.26e-111	0.252974	0.629	0.384	2	Dendritic cell 1
PDIA4	1.33e-115	2.67e-111	-0.416624	0.269	0.517	2	Dendritic cell 1
CREB5	1.92e-115	3.87e-111	0.255321	0.448	0.223	2	Dendritic cell 1
CCL5	3.13e-115	6.31e-111	-2.47958	0.045	0.282	2	Dendritic cell 1
MACF1	6.1e-115	1.23e-110	-0.450223	0.58	0.723	2	Dendritic cell 1
MTSS1	2.6e-114	5.23e-110	-0.400864	0.135	0.396	2	Dendritic cell 1
FYB	1.34e-113	2.71e-109	-0.426389	0.838	0.845	2	Dendritic cell 1
IL10	1.63e-113	3.28e-109	-0.280064	0.02	0.256	2	Dendritic cell 1
MDFIC	1.92e-113	3.87e-109	-0.438145	0.239	0.496	2	Dendritic cell 1
GBA	3.19e-113	6.42e-109	-0.295822	0.087	0.343	2	Dendritic cell 1
SMDT1	3.23e-113	6.51e-109	0.250873	0.866	0.642	2	Dendritic cell 1
GCH1	3.85e-113	7.75e-109	-0.317937	0.079	0.333	2	Dendritic cell 1
GSN	5.78e-113	1.16e-108	0.287736	0.73	0.459	2	Dendritic cell 1
NEAT1	1.94e-112	3.9e-108	-0.590804	0.994	0.924	2	Dendritic cell 1
ATP6V1B2	2.61e-112	5.26e-108	-0.418607	0.328	0.554	2	Dendritic cell 1
ALDOA	3.95e-112	7.96e-108	-0.349932	0.86	0.825	2	Dendritic cell 1
LINC01094	5.73e-112	1.15e-107	-0.383304	0.08	0.33	2	Dendritic cell 1
PLEKHO2	1.22e-111	2.46e-107	-0.434334	0.292	0.527	2	Dendritic cell 1
MNDA	1.55e-111	3.12e-107	0.257415	0.951	0.696	2	Dendritic cell 1
CD33	3.89e-111	7.84e-107	0.277723	0.714	0.471	2	Dendritic cell 1
CXCL16	4.22e-110	8.5e-106	0.27624	0.599	0.36	2	Dendritic cell 1
RAB1A	1.87e-109	3.77e-105	-0.431341	0.374	0.574	2	Dendritic cell 1
YWHAZ	1.94e-109	3.9e-105	-0.348319	0.925	0.917	2	Dendritic cell 1
PIK3AP1	4e-109	8.05e-105	-0.398627	0.289	0.528	2	Dendritic cell 1
KLF2	6.16e-109	1.24e-104	-0.521971	0.722	0.801	2	Dendritic cell 1
COX6C	8.91e-109	1.8e-104	-0.315198	0.92	0.885	2	Dendritic cell 1
C20orf27	1.09e-108	2.2e-104	0.263909	0.749	0.5	2	Dendritic cell 1
FKBP1A	1.28e-108	2.57e-104	-0.400248	0.859	0.786	2	Dendritic cell 1
MTDH	2.57e-108	5.18e-104	0.299575	0.947	0.808	2	Dendritic cell 1
TXN	2.93e-108	5.9e-104	-0.487088	0.685	0.763	2	Dendritic cell 1
HPS5	3.1e-108	6.23e-104	0.269182	0.573	0.346	2	Dendritic cell 1
TNFSF13B	5.48e-108	1.1e-103	0.254958	0.785	0.53	2	Dendritic cell 1
LAMP2	7.27e-108	1.46e-103	-0.423781	0.47	0.628	2	Dendritic cell 1
SLC43A3	3.49e-107	7.03e-103	-0.327554	0.158	0.413	2	Dendritic cell 1
FAM101B	6.79e-107	1.37e-102	-0.461553	0.04	0.27	2	Dendritic cell 1
TSPAN4	8.95e-107	1.8e-102	-0.396433	0.179	0.42	2	Dendritic cell 1
NKG7	1.12e-106	2.25e-102	-1.69702	0.037	0.261	2	Dendritic cell 1
SLC25A5	1.58e-106	3.18e-102	0.299361	0.935	0.753	2	Dendritic cell 1
ATP2A2	2.53e-106	5.09e-102	-0.368721	0.265	0.504	2	Dendritic cell 1
AGFG1	3.44e-106	6.93e-102	-0.442662	0.363	0.569	2	Dendritic cell 1
SRGN	7.2e-106	1.45e-101	-0.369378	0.982	0.927	2	Dendritic cell 1
UPP1	7.8e-105	1.57e-100	-0.385836	0.235	0.48	2	Dendritic cell 1
SLC31A1	1.09e-104	2.2e-100	-0.316003	0.174	0.425	2	Dendritic cell 1
MEF2C	1.64e-104	3.31e-100	0.292417	0.948	0.674	2	Dendritic cell 1
CTSC	7.38e-104	1.49e-99	-0.444833	0.738	0.773	2	Dendritic cell 1
NOP10	9.4e-104	1.89e-99	-0.392373	0.745	0.77	2	Dendritic cell 1
S100A11	1.28e-103	2.58e-99	-0.319752	0.981	0.956	2	Dendritic cell 1
AP1B1	2.4e-103	4.84e-99	-0.41071	0.28	0.505	2	Dendritic cell 1
NTAN1	3.12e-103	6.28e-99	-0.394554	0.249	0.482	2	Dendritic cell 1
IFI30	5.27e-103	1.06e-98	0.345369	0.708	0.471	2	Dendritic cell 1
LACC1	1.06e-102	2.12e-98	-0.298746	0.087	0.328	2	Dendritic cell 1
DOCK4	1.18e-102	2.38e-98	-0.266701	0.044	0.273	2	Dendritic cell 1
ACTR2	3.09e-102	6.23e-98	-0.324244	0.965	0.877	2	Dendritic cell 1
ZDHHC20	6.33e-102	1.28e-97	-0.350435	0.227	0.47	2	Dendritic cell 1
SCIMP	2.27e-101	4.58e-97	0.2737	0.766	0.532	2	Dendritic cell 1
LILRB2	5.6e-101	1.13e-96	-0.450379	0.335	0.542	2	Dendritic cell 1
RNF213	1.15e-100	2.31e-96	-0.439933	0.763	0.806	2	Dendritic cell 1
IDH1	1.84e-100	3.72e-96	-0.455139	0.247	0.469	2	Dendritic cell 1
BLOC1S6	2.97e-100	5.99e-96	0.269888	0.788	0.559	2	Dendritic cell 1
SNX2	3.19e-100	6.43e-96	-0.44057	0.632	0.682	2	Dendritic cell 1
FOS	3.56e-100	7.16e-96	0.299718	0.964	0.73	2	Dendritic cell 1
POMP	5.92e-100	1.19e-95	-0.323395	0.9	0.831	2	Dendritic cell 1
APPL1	2.12e-99	4.26e-95	0.258701	0.785	0.556	2	Dendritic cell 1
MRC1	2.23e-99	4.49e-95	0.559094	0.63	0.453	2	Dendritic cell 1
MSR1	4.09e-99	8.23e-95	-0.73149	0.556	0.632	2	Dendritic cell 1
FTH1	3.09e-98	6.22e-94	-0.60734	0.997	0.992	2	Dendritic cell 1
SEC61G	4.36e-98	8.78e-94	-0.356474	0.797	0.796	2	Dendritic cell 1
TCN2	6.98e-98	1.41e-93	-0.265012	0.047	0.266	2	Dendritic cell 1
PYCARD	3.06e-97	6.16e-93	0.273508	0.92	0.724	2	Dendritic cell 1
SLC3A2	3.71e-97	7.48e-93	-0.338429	0.208	0.447	2	Dendritic cell 1
RBM47	4.21e-97	8.48e-93	-0.497549	0.471	0.612	2	Dendritic cell 1
RAB8B	1.96e-96	3.95e-92	-0.401338	0.498	0.651	2	Dendritic cell 1
ADAM10	2.4e-96	4.82e-92	-0.380115	0.373	0.576	2	Dendritic cell 1
SPCS3	1.38e-95	2.77e-91	-0.378803	0.703	0.744	2	Dendritic cell 1
CAPZB	1.93e-95	3.88e-91	-0.344002	0.817	0.802	2	Dendritic cell 1
SDF2L1	3.64e-95	7.34e-91	-0.471324	0.44	0.607	2	Dendritic cell 1
FCN1	4.95e-94	9.97e-90	-0.751388	0.433	0.624	2	Dendritic cell 1
GYPC	2.55e-93	5.13e-89	-0.502642	0.259	0.473	2	Dendritic cell 1
SLFN5	4.17e-93	8.39e-89	-0.541258	0.232	0.459	2	Dendritic cell 1
STXBP2	4.39e-93	8.85e-89	-0.389324	0.283	0.501	2	Dendritic cell 1
TNFAIP2	5.76e-93	1.16e-88	-0.375088	0.205	0.441	2	Dendritic cell 1
NR4A2	1.26e-92	2.54e-88	0.267536	0.415	0.211	2	Dendritic cell 1
GAS7	2.64e-92	5.32e-88	-0.420219	0.312	0.512	2	Dendritic cell 1
XBP1	8.65e-92	1.74e-87	-0.391496	0.318	0.538	2	Dendritic cell 1
MGAT1	1.07e-91	2.16e-87	-0.432119	0.51	0.636	2	Dendritic cell 1
SURF4	2.66e-91	5.35e-87	-0.320563	0.214	0.449	2	Dendritic cell 1
CALU	3.01e-91	6.05e-87	-0.330255	0.204	0.431	2	Dendritic cell 1
ACTN4	1.09e-90	2.2e-86	-0.394651	0.452	0.634	2	Dendritic cell 1
DICER1	1.44e-89	2.9e-85	-0.384691	0.428	0.607	2	Dendritic cell 1
FCGR1B	1.62e-88	3.26e-84	-0.286998	0.126	0.351	2	Dendritic cell 1
FAM20C	2.56e-88	5.16e-84	-0.366073	0.185	0.408	2	Dendritic cell 1
C6orf62	5.31e-88	1.07e-83	-0.41475	0.585	0.688	2	Dendritic cell 1
FGD2	5.44e-88	1.09e-83	0.265186	0.609	0.396	2	Dendritic cell 1
DENND2D	7.98e-88	1.61e-83	-0.291814	0.05	0.256	2	Dendritic cell 1
NDUFS5	4.04e-87	8.13e-83	-0.3096	0.823	0.811	2	Dendritic cell 1
HYOU1	5.81e-87	1.17e-82	-0.279274	0.108	0.329	2	Dendritic cell 1
PLXND1	7.03e-87	1.42e-82	-0.267011	0.119	0.343	2	Dendritic cell 1
ASGR1	7.37e-87	1.48e-82	-0.324087	0.156	0.376	2	Dendritic cell 1
DDX60L	1.36e-85	2.73e-81	-0.379017	0.348	0.542	2	Dendritic cell 1
RAP2B	1.39e-85	2.8e-81	-0.457106	0.585	0.668	2	Dendritic cell 1
MS4A7	3.4e-85	6.84e-81	-0.607854	0.643	0.658	2	Dendritic cell 1
FERMT3	4.83e-85	9.73e-81	-0.365137	0.524	0.652	2	Dendritic cell 1
VAMP8	1.76e-84	3.55e-80	-0.269106	0.97	0.888	2	Dendritic cell 1
NCEH1	3.66e-84	7.36e-80	-0.286346	0.171	0.393	2	Dendritic cell 1
WDR1	7.26e-84	1.46e-79	-0.358542	0.502	0.643	2	Dendritic cell 1
TYMP	9.26e-84	1.86e-79	-0.47588	0.947	0.787	2	Dendritic cell 1
P2RX7	1.48e-83	2.98e-79	-0.303995	0.126	0.343	2	Dendritic cell 1
NAA50	2.63e-83	5.29e-79	-0.336755	0.297	0.506	2	Dendritic cell 1
KPNB1	6e-83	1.21e-78	-0.375558	0.556	0.661	2	Dendritic cell 1
PSMA7	1.29e-82	2.61e-78	-0.267635	0.941	0.89	2	Dendritic cell 1
HNRNPK	4.05e-82	8.15e-78	-0.284007	0.899	0.872	2	Dendritic cell 1
EIF4G1	4.47e-82	9e-78	-0.344762	0.384	0.56	2	Dendritic cell 1
ITSN1	6.34e-82	1.28e-77	-0.296292	0.106	0.314	2	Dendritic cell 1
HNRNPA3	3.6e-81	7.25e-77	-0.289338	0.906	0.871	2	Dendritic cell 1
SYNCRIP	4.73e-81	9.53e-77	-0.35588	0.611	0.694	2	Dendritic cell 1
RNF141	8.7e-81	1.75e-76	-0.401484	0.321	0.507	2	Dendritic cell 1
TCIRG1	1.5e-80	3.01e-76	-0.325484	0.331	0.527	2	Dendritic cell 1
OGDH	2e-80	4.02e-76	-0.313028	0.235	0.448	2	Dendritic cell 1
TBC1D1	2.22e-80	4.48e-76	-0.401887	0.43	0.587	2	Dendritic cell 1
PTPRJ	4.17e-80	8.39e-76	-0.318387	0.267	0.477	2	Dendritic cell 1
HLA-C	5.41e-80	1.09e-75	-0.263764	0.979	0.972	2	Dendritic cell 1
ATP6V1A	6.43e-80	1.3e-75	-0.339975	0.293	0.491	2	Dendritic cell 1
MANF	9.96e-80	2.01e-75	-0.37357	0.359	0.548	2	Dendritic cell 1
ANXA5	2.21e-79	4.44e-75	-0.300116	0.933	0.837	2	Dendritic cell 1
SULT1A1	3.76e-79	7.57e-75	-0.296764	0.13	0.336	2	Dendritic cell 1
NCKAP1L	4.39e-79	8.84e-75	-0.376103	0.709	0.713	2	Dendritic cell 1
IER5L	5.96e-79	1.2e-74	-0.319328	0.161	0.371	2	Dendritic cell 1
SLC38A10	2.5e-78	5.04e-74	-0.266067	0.162	0.378	2	Dendritic cell 1
RARRES3	8.06e-78	1.62e-73	-0.60027	0.409	0.573	2	Dendritic cell 1
ATOX1	1.61e-77	3.24e-73	-0.394391	0.631	0.675	2	Dendritic cell 1
SLC35F6	1.68e-77	3.39e-73	-0.288626	0.192	0.4	2	Dendritic cell 1
ITGB5	8.74e-77	1.76e-72	-0.296483	0.185	0.394	2	Dendritic cell 1
UBR4	2.42e-76	4.88e-72	-0.298391	0.231	0.442	2	Dendritic cell 1
MGST3	8.19e-76	1.65e-71	-0.345934	0.588	0.683	2	Dendritic cell 1
CCR1	1.25e-75	2.52e-71	-0.463552	0.588	0.645	2	Dendritic cell 1
ARL8B	3.65e-75	7.35e-71	-0.313516	0.339	0.525	2	Dendritic cell 1
CORO1C	8.17e-75	1.65e-70	-0.332001	0.351	0.527	2	Dendritic cell 1
NRAS	1.17e-74	2.35e-70	-0.258485	0.162	0.372	2	Dendritic cell 1
CD2	1.56e-74	3.15e-70	-0.424729	0.651	0.314	2	Dendritic cell 1
CLIC4	2.2e-74	4.43e-70	-0.273467	0.143	0.346	2	Dendritic cell 1
MAGT1	3.51e-74	7.08e-70	-0.300811	0.262	0.46	2	Dendritic cell 1
NDUFS6	5.97e-74	1.2e-69	-0.284768	0.818	0.783	2	Dendritic cell 1
MT1X	2.8e-72	5.64e-68	-0.369258	0.1	0.291	2	Dendritic cell 1
UQCR10	1.06e-71	2.13e-67	-0.257123	0.908	0.858	2	Dendritic cell 1
PDXK	1.56e-71	3.15e-67	-0.27983	0.233	0.436	2	Dendritic cell 1
PLD3	3.98e-71	8.02e-67	-0.319318	0.217	0.411	2	Dendritic cell 1
PGAM1	4.26e-71	8.59e-67	-0.327443	0.538	0.638	2	Dendritic cell 1
TPM4	5.43e-71	1.09e-66	-0.367465	0.711	0.729	2	Dendritic cell 1
RASGEF1B	7.13e-71	1.44e-66	-0.308277	0.184	0.388	2	Dendritic cell 1
LYAR	8.17e-71	1.65e-66	-0.46399	0.238	0.433	2	Dendritic cell 1
ZEB2	1.57e-70	3.16e-66	-0.470143	0.863	0.751	2	Dendritic cell 1
SOD2	2.29e-70	4.6e-66	-0.562185	0.392	0.544	2	Dendritic cell 1
VCP	2.84e-70	5.71e-66	-0.318443	0.421	0.579	2	Dendritic cell 1
TGFBI	3.72e-70	7.49e-66	-0.454109	0.606	0.641	2	Dendritic cell 1
MFSD1	1.74e-69	3.51e-65	-0.394739	0.57	0.63	2	Dendritic cell 1
AGTRAP	1.88e-69	3.79e-65	-0.299685	0.184	0.379	2	Dendritic cell 1
BSG	2.09e-69	4.22e-65	-0.319131	0.409	0.563	2	Dendritic cell 1
RETN	2.24e-69	4.51e-65	-0.610245	0.342	0.506	2	Dendritic cell 1
RAP1B	2.99e-69	6.03e-65	-0.333628	0.729	0.753	2	Dendritic cell 1
ATP1B3	3.3e-69	6.65e-65	-0.33374	0.589	0.663	2	Dendritic cell 1
RXRA	5.86e-69	1.18e-64	-0.291679	0.258	0.454	2	Dendritic cell 1
APLP2	1.81e-68	3.64e-64	-0.394404	0.892	0.748	2	Dendritic cell 1
ABCC5	1.88e-68	3.8e-64	-0.256143	0.14	0.334	2	Dendritic cell 1
FEM1B	2.26e-68	4.56e-64	-0.257887	0.174	0.374	2	Dendritic cell 1
SLC9A3R1	4.07e-68	8.19e-64	-0.369273	0.213	0.403	2	Dendritic cell 1
CCDC167	6.69e-68	1.35e-63	-0.317145	0.24	0.434	2	Dendritic cell 1
ABI3	8.23e-68	1.66e-63	-0.341902	0.37	0.524	2	Dendritic cell 1
EIF1AX	8.36e-68	1.68e-63	-0.315865	0.769	0.779	2	Dendritic cell 1
PAPSS1	1.48e-67	2.97e-63	-0.274422	0.24	0.434	2	Dendritic cell 1
SLA	1.5e-67	3.03e-63	-0.35197	0.38	0.541	2	Dendritic cell 1
DNAJB1	4.29e-67	8.65e-63	-0.318649	0.248	0.446	2	Dendritic cell 1
PGK1	4.56e-67	9.18e-63	-0.298504	0.78	0.765	2	Dendritic cell 1
SHISA5	4.76e-67	9.59e-63	-0.318474	0.309	0.498	2	Dendritic cell 1
SCPEP1	6.27e-67	1.26e-62	-0.307157	0.287	0.465	2	Dendritic cell 1
ARPC4	1.32e-66	2.65e-62	-0.279728	0.828	0.794	2	Dendritic cell 1
GOLGA4	1.5e-66	3.03e-62	-0.36788	0.537	0.65	2	Dendritic cell 1
FAM91A1	2.3e-66	4.64e-62	-0.287989	0.306	0.492	2	Dendritic cell 1
CAPNS1	2.62e-66	5.29e-62	-0.309793	0.734	0.729	2	Dendritic cell 1
PDCD6IP	5.13e-66	1.03e-61	-0.335598	0.493	0.612	2	Dendritic cell 1
BIN2	2.84e-65	5.72e-61	-0.367486	0.38	0.551	2	Dendritic cell 1
GBP5	2.9e-65	5.85e-61	-0.41386	0.08	0.253	2	Dendritic cell 1
HNMT	3.33e-65	6.7e-61	-0.404485	0.598	0.635	2	Dendritic cell 1
GNB2	1.28e-64	2.59e-60	-0.305255	0.763	0.741	2	Dendritic cell 1
SFPQ	1.56e-64	3.15e-60	-0.315722	0.692	0.735	2	Dendritic cell 1
IRAK1	3.86e-64	7.77e-60	-0.25392	0.18	0.37	2	Dendritic cell 1
RPN2	4.34e-64	8.73e-60	-0.324144	0.61	0.667	2	Dendritic cell 1
GMFB	7.49e-64	1.51e-59	-0.259441	0.229	0.421	2	Dendritic cell 1
FKBP15	9.23e-64	1.86e-59	-0.317253	0.415	0.563	2	Dendritic cell 1
HSPB1	1.01e-63	2.04e-59	-0.491864	0.55	0.635	2	Dendritic cell 1
MT2A	1.2e-63	2.41e-59	-0.629533	0.422	0.559	2	Dendritic cell 1
CNDP2	1.27e-63	2.57e-59	-0.351004	0.479	0.585	2	Dendritic cell 1
ATP6V0D1	2.2e-63	4.42e-59	-0.342527	0.624	0.665	2	Dendritic cell 1
SELT	2.51e-63	5.06e-59	-0.302056	0.601	0.671	2	Dendritic cell 1
TIMP2	2.58e-63	5.19e-59	-0.352166	0.485	0.586	2	Dendritic cell 1
MYH9	3.24e-63	6.52e-59	-0.356131	0.666	0.734	2	Dendritic cell 1
YWHAG	3.82e-63	7.69e-59	-0.326775	0.513	0.614	2	Dendritic cell 1
TMED5	5.79e-63	1.17e-58	-0.301384	0.448	0.592	2	Dendritic cell 1
NUCB1	8.17e-63	1.65e-58	-0.28763	0.324	0.496	2	Dendritic cell 1
RHOB	8.91e-63	1.79e-58	-0.494935	0.426	0.564	2	Dendritic cell 1
CDV3	1.39e-62	2.8e-58	-0.287412	0.82	0.784	2	Dendritic cell 1
DDX17	1.64e-62	3.31e-58	-0.271621	0.894	0.866	2	Dendritic cell 1
IRF1	1.68e-62	3.38e-58	-0.442774	0.461	0.609	2	Dendritic cell 1
WDR26	1.79e-62	3.61e-58	-0.303705	0.29	0.467	2	Dendritic cell 1
FUCA1	1.94e-62	3.9e-58	-0.256446	0.146	0.326	2	Dendritic cell 1
MYO5A	1.96e-62	3.94e-58	-0.329616	0.37	0.526	2	Dendritic cell 1
SERINC1	2.48e-62	4.99e-58	-0.31639	0.5	0.622	2	Dendritic cell 1
TCF12	2.75e-62	5.54e-58	-0.254569	0.204	0.392	2	Dendritic cell 1
SOAT1	9.09e-62	1.83e-57	-0.263414	0.25	0.436	2	Dendritic cell 1
SEC61A1	1.18e-61	2.37e-57	-0.25248	0.227	0.417	2	Dendritic cell 1
HSBP1	1.87e-61	3.76e-57	-0.319794	0.778	0.726	2	Dendritic cell 1
SIRPA	3.16e-61	6.36e-57	-0.2794	0.326	0.501	2	Dendritic cell 1
TGOLN2	5.14e-61	1.04e-56	-0.291528	0.752	0.759	2	Dendritic cell 1
CD99	9.41e-61	1.9e-56	-0.413735	0.582	0.688	2	Dendritic cell 1
HSPA1A	1.11e-60	2.24e-56	-0.435098	0.533	0.622	2	Dendritic cell 1
SPG21	1.36e-60	2.74e-56	-0.326797	0.474	0.59	2	Dendritic cell 1
HDLBP	1.4e-60	2.83e-56	-0.3163	0.454	0.583	2	Dendritic cell 1
ME2	2.24e-60	4.51e-56	-0.406898	0.466	0.573	2	Dendritic cell 1
SEPW1	2.87e-60	5.79e-56	-0.318775	0.676	0.72	2	Dendritic cell 1
RAB27A	8.36e-60	1.68e-55	-0.339209	0.129	0.3	2	Dendritic cell 1
G3BP1	1e-59	2.02e-55	-0.30792	0.536	0.645	2	Dendritic cell 1
SQRDL	1.06e-59	2.14e-55	-0.296294	0.384	0.532	2	Dendritic cell 1
TNFRSF1A	1.38e-59	2.79e-55	-0.300361	0.443	0.575	2	Dendritic cell 1
HELZ	1.54e-59	3.11e-55	-0.309556	0.333	0.503	2	Dendritic cell 1
CPEB4	5.52e-59	1.11e-54	-0.27938	0.3	0.474	2	Dendritic cell 1
APBB1IP	5.67e-59	1.14e-54	-0.3053	0.764	0.765	2	Dendritic cell 1
TUBB4B	7.47e-59	1.5e-54	-0.313503	0.326	0.485	2	Dendritic cell 1
RPS27L	1.76e-58	3.54e-54	-0.309275	0.825	0.841	2	Dendritic cell 1
NECAP2	2.86e-58	5.76e-54	-0.293546	0.422	0.561	2	Dendritic cell 1
UBE3A	2.93e-58	5.9e-54	-0.318274	0.425	0.566	2	Dendritic cell 1
AKR1A1	3.25e-58	6.55e-54	-0.309288	0.527	0.615	2	Dendritic cell 1
PTBP1	7.46e-58	1.5e-53	-0.270564	0.278	0.457	2	Dendritic cell 1
MVP	1.65e-57	3.32e-53	-0.276759	0.324	0.49	2	Dendritic cell 1
PNKD	3.14e-57	6.31e-53	-0.282382	0.252	0.421	2	Dendritic cell 1
ANXA2	3.39e-57	6.82e-53	-0.297002	0.914	0.847	2	Dendritic cell 1
IL10RB	3.42e-57	6.89e-53	-0.275481	0.356	0.517	2	Dendritic cell 1
ARL6IP1	4.35e-57	8.77e-53	-0.328433	0.484	0.596	2	Dendritic cell 1
AES	5.53e-57	1.11e-52	-0.386729	0.763	0.779	2	Dendritic cell 1
SYNE1	8.15e-57	1.64e-52	-0.374884	0.117	0.282	2	Dendritic cell 1
HLA-DQA2	1.43e-56	2.88e-52	0.977635	0.354	0.242	2	Dendritic cell 1
IGF2R	1.88e-56	3.78e-52	-0.252226	0.123	0.293	2	Dendritic cell 1
TMED9	2.41e-56	4.85e-52	-0.293154	0.523	0.618	2	Dendritic cell 1
C20orf24	2.91e-56	5.87e-52	-0.309833	0.495	0.6	2	Dendritic cell 1
SQSTM1	6.51e-56	1.31e-51	-0.364518	0.585	0.653	2	Dendritic cell 1
UQCRQ	1.08e-55	2.17e-51	-0.283064	0.76	0.744	2	Dendritic cell 1
ATP6V1F	1.11e-55	2.24e-51	-0.291207	0.778	0.745	2	Dendritic cell 1
TFEC	2.58e-55	5.19e-51	-0.270447	0.343	0.507	2	Dendritic cell 1
PSMD1	9.93e-55	2e-50	-0.287519	0.431	0.568	2	Dendritic cell 1
FAM120A	2.41e-54	4.85e-50	-0.292839	0.575	0.648	2	Dendritic cell 1
CMTM7	7.1e-54	1.43e-49	-0.256126	0.286	0.457	2	Dendritic cell 1
IFI44	7.36e-54	1.48e-49	-0.293291	0.263	0.43	2	Dendritic cell 1
ATXN1	9.14e-54	1.84e-49	-0.271274	0.207	0.379	2	Dendritic cell 1
UCP2	1.55e-53	3.12e-49	-0.378548	0.77	0.738	2	Dendritic cell 1
SLC16A7	2.42e-53	4.87e-49	-0.267107	0.185	0.353	2	Dendritic cell 1
RNF19A	9.85e-53	1.98e-48	-0.334936	0.364	0.518	2	Dendritic cell 1
LILRB1	2.25e-52	4.52e-48	-0.256264	0.262	0.434	2	Dendritic cell 1
CD164	5.56e-52	1.12e-47	-0.25941	0.764	0.758	2	Dendritic cell 1
PSME2	7e-52	1.41e-47	-0.292732	0.85	0.793	2	Dendritic cell 1
RTN3	1.04e-51	2.1e-47	-0.287967	0.457	0.568	2	Dendritic cell 1
CTSS	1.05e-51	2.11e-47	-0.417818	0.975	0.816	2	Dendritic cell 1
PPP1CA	2.58e-51	5.19e-47	-0.261348	0.753	0.762	2	Dendritic cell 1
PEPD	3.04e-51	6.11e-47	-0.30256	0.355	0.496	2	Dendritic cell 1
SPPL2A	5.05e-51	1.02e-46	-0.284001	0.426	0.555	2	Dendritic cell 1
ARMT1	6.77e-51	1.36e-46	-0.276045	0.29	0.442	2	Dendritic cell 1
VPS26A	1.02e-50	2.05e-46	-0.27463	0.393	0.53	2	Dendritic cell 1
RHOQ	3.52e-50	7.1e-46	-0.317467	0.446	0.558	2	Dendritic cell 1
COPA	4.43e-50	8.91e-46	-0.255549	0.445	0.575	2	Dendritic cell 1
PIK3R1	7.17e-50	1.44e-45	-0.357545	0.46	0.582	2	Dendritic cell 1
PECAM1	1.11e-49	2.23e-45	-0.291162	0.322	0.475	2	Dendritic cell 1
ATP6AP2	1.61e-49	3.24e-45	-0.271832	0.729	0.715	2	Dendritic cell 1
M6PR	1.74e-49	3.51e-45	-0.280198	0.742	0.721	2	Dendritic cell 1
ZCCHC6	4.46e-49	8.97e-45	-0.277025	0.364	0.508	2	Dendritic cell 1
CSTB	8.11e-49	1.63e-44	-0.303958	0.951	0.867	2	Dendritic cell 1
VASP	1.51e-48	3.05e-44	-0.298774	0.731	0.717	2	Dendritic cell 1
NFIC	1.54e-48	3.1e-44	-0.255751	0.304	0.459	2	Dendritic cell 1
IFNGR2	2.23e-48	4.49e-44	-0.343236	0.589	0.631	2	Dendritic cell 1
MS4A4A	3.35e-48	6.75e-44	-0.392574	0.406	0.51	2	Dendritic cell 1
CTNNB1	9.82e-48	1.98e-43	-0.264253	0.432	0.562	2	Dendritic cell 1
DNAJB11	1.11e-47	2.23e-43	-0.253342	0.358	0.504	2	Dendritic cell 1
PSMA4	2.13e-47	4.29e-43	-0.270537	0.754	0.742	2	Dendritic cell 1
EPS15	2.32e-47	4.68e-43	-0.295574	0.421	0.547	2	Dendritic cell 1
SETX	4.06e-47	8.17e-43	-0.293335	0.601	0.67	2	Dendritic cell 1
EMILIN2	4.68e-47	9.42e-43	-0.25278	0.372	0.516	2	Dendritic cell 1
TGFB1	4.79e-47	9.66e-43	-0.291472	0.549	0.638	2	Dendritic cell 1
LCP2	9.33e-47	1.88e-42	-0.290928	0.556	0.64	2	Dendritic cell 1
RRAS	1.26e-46	2.53e-42	-0.27228	0.344	0.483	2	Dendritic cell 1
EHD1	2.83e-46	5.7e-42	-0.251326	0.169	0.322	2	Dendritic cell 1
GNB1	3.71e-46	7.47e-42	-0.263311	0.746	0.736	2	Dendritic cell 1
ITGAL	7.68e-46	1.55e-41	-0.27807	0.157	0.31	2	Dendritic cell 1
EIF5A	8.38e-46	1.69e-41	-0.275277	0.672	0.701	2	Dendritic cell 1
BCAP31	8.69e-46	1.75e-41	-0.280423	0.585	0.645	2	Dendritic cell 1
GBP2	1.67e-45	3.36e-41	-0.288455	0.285	0.438	2	Dendritic cell 1
HSPE1	1.85e-45	3.73e-41	-0.304145	0.772	0.752	2	Dendritic cell 1
PARP14	2.07e-45	4.17e-41	-0.321757	0.478	0.58	2	Dendritic cell 1
RAB5C	2.12e-45	4.28e-41	-0.272389	0.662	0.676	2	Dendritic cell 1
PPP1R18	6.96e-45	1.4e-40	-0.295807	0.588	0.656	2	Dendritic cell 1
FBXW5	1.61e-44	3.24e-40	-0.251152	0.368	0.505	2	Dendritic cell 1
PCSK7	1.87e-44	3.76e-40	-0.301641	0.363	0.508	2	Dendritic cell 1
ADAR	2.52e-44	5.07e-40	-0.274196	0.59	0.665	2	Dendritic cell 1
PTP4A2	3.13e-44	6.31e-40	-0.253837	0.822	0.803	2	Dendritic cell 1
ACAA2	3.82e-44	7.7e-40	-0.271851	0.432	0.55	2	Dendritic cell 1
PLEC	8.68e-44	1.75e-39	-0.268805	0.362	0.499	2	Dendritic cell 1
SPCS2	1.1e-43	2.21e-39	-0.262885	0.796	0.769	2	Dendritic cell 1
CTNNA1	1.28e-43	2.57e-39	-0.268054	0.468	0.569	2	Dendritic cell 1
COX20	1.4e-43	2.83e-39	-0.272475	0.576	0.65	2	Dendritic cell 1
ERBB2IP	1.73e-43	3.48e-39	-0.268635	0.352	0.494	2	Dendritic cell 1
YBX3	2.04e-43	4.1e-39	-0.264379	0.481	0.59	2	Dendritic cell 1
PLEKHB2	3.29e-43	6.62e-39	-0.27942	0.52	0.6	2	Dendritic cell 1
TIMM8B	3.39e-43	6.82e-39	-0.261421	0.595	0.645	2	Dendritic cell 1
ARHGEF3	4.05e-43	8.15e-39	-0.273188	0.287	0.435	2	Dendritic cell 1
ZCCHC11	4.36e-43	8.77e-39	-0.295549	0.198	0.347	2	Dendritic cell 1
UGP2	8.27e-43	1.66e-38	-0.278133	0.476	0.583	2	Dendritic cell 1
TMEM30A	1.24e-42	2.49e-38	-0.269296	0.422	0.545	2	Dendritic cell 1
STAT1	2.67e-42	5.38e-38	-0.354452	0.625	0.671	2	Dendritic cell 1
GTF3C6	4.77e-42	9.61e-38	-0.26158	0.604	0.652	2	Dendritic cell 1
MAP1LC3B	6.11e-42	1.23e-37	-0.285439	0.627	0.678	2	Dendritic cell 1
VIMP	6.79e-42	1.37e-37	-0.272044	0.386	0.515	2	Dendritic cell 1
PBRM1	3.08e-41	6.19e-37	-0.269853	0.457	0.568	2	Dendritic cell 1
PPP2R5C	3.38e-41	6.81e-37	-0.409593	0.474	0.582	2	Dendritic cell 1
DYNLT3	4.27e-41	8.59e-37	-0.251978	0.25	0.396	2	Dendritic cell 1
AHNAK	6.87e-41	1.38e-36	-0.258541	0.925	0.879	2	Dendritic cell 1
STK10	7.95e-41	1.6e-36	-0.316711	0.524	0.6	2	Dendritic cell 1
BTN3A2	1.77e-40	3.56e-36	-0.35047	0.311	0.446	2	Dendritic cell 1
DNAJC3	3.32e-40	6.68e-36	-0.273497	0.465	0.565	2	Dendritic cell 1
KLF3	9.93e-40	2e-35	-0.314921	0.577	0.624	2	Dendritic cell 1
NUCB2	1.46e-39	2.93e-35	-0.286213	0.167	0.306	2	Dendritic cell 1
SMG1	2.39e-39	4.82e-35	-0.257285	0.443	0.558	2	Dendritic cell 1
PARP1	8.52e-39	1.72e-34	-0.281672	0.405	0.52	2	Dendritic cell 1
ZYX	1.03e-38	2.08e-34	-0.270107	0.613	0.646	2	Dendritic cell 1
PDK4	2.66e-38	5.35e-34	-0.440513	0.563	0.598	2	Dendritic cell 1
CDK6	4.3e-38	8.66e-34	-0.304167	0.288	0.418	2	Dendritic cell 1
APMAP	7.03e-38	1.42e-33	-0.258552	0.268	0.405	2	Dendritic cell 1
WIPF1	7.09e-38	1.43e-33	-0.285748	0.664	0.695	2	Dendritic cell 1
EIF5B	1.11e-37	2.24e-33	-0.261555	0.693	0.712	2	Dendritic cell 1
SERPINA1	2.58e-37	5.2e-33	-0.3598	0.584	0.61	2	Dendritic cell 1
CCDC109B	1.26e-36	2.53e-32	-0.253446	0.451	0.556	2	Dendritic cell 1
N4BP1	1.62e-36	3.26e-32	-0.251164	0.318	0.45	2	Dendritic cell 1
WNK1	1.05e-35	2.11e-31	-0.259019	0.636	0.673	2	Dendritic cell 1
LGALS3	1.06e-35	2.13e-31	-0.356286	0.789	0.733	2	Dendritic cell 1
ADGRE5	1.31e-34	2.63e-30	-0.303902	0.502	0.585	2	Dendritic cell 1
KRAS	2.49e-34	5.01e-30	-0.254481	0.57	0.635	2	Dendritic cell 1
HCST	2.82e-34	5.68e-30	-0.411113	0.872	0.849	2	Dendritic cell 1
SMS	1.49e-33	3e-29	-0.257722	0.444	0.532	2	Dendritic cell 1
FPR3	2.07e-33	4.17e-29	-0.39526	0.636	0.608	2	Dendritic cell 1
MT-ND4L	2.22e-33	4.48e-29	-0.292493	0.878	0.816	2	Dendritic cell 1
SKIL	4.66e-33	9.38e-29	-0.264564	0.398	0.515	2	Dendritic cell 1
ISG15	1.06e-32	2.13e-28	-0.269113	0.56	0.643	2	Dendritic cell 1
HLA-F	1.21e-32	2.44e-28	-0.296245	0.512	0.593	2	Dendritic cell 1
DSTN	3.77e-32	7.6e-28	-0.280386	0.487	0.574	2	Dendritic cell 1
PCM1	4.86e-31	9.79e-27	-0.275003	0.558	0.626	2	Dendritic cell 1
WARS	6.47e-31	1.3e-26	-0.306917	0.402	0.498	2	Dendritic cell 1
DDX6	8.1e-31	1.63e-26	-0.260452	0.447	0.549	2	Dendritic cell 1
TIMP1	1.39e-30	2.8e-26	-0.548902	0.915	0.762	2	Dendritic cell 1
SUN2	2.69e-30	5.42e-26	-0.271587	0.25	0.371	2	Dendritic cell 1
ITGAM	1.14e-28	2.3e-24	-0.287497	0.686	0.652	2	Dendritic cell 1
LYN	1.41e-28	2.83e-24	-0.321788	0.782	0.688	2	Dendritic cell 1
GNG2	3.9e-28	7.85e-24	-0.264539	0.402	0.503	2	Dendritic cell 1
MYOF	4.96e-28	1e-23	-0.262994	0.549	0.583	2	Dendritic cell 1
CSF1R	2.34e-27	4.71e-23	-0.253078	0.562	0.59	2	Dendritic cell 1
SRSF7	2e-26	4.03e-22	-0.254247	0.803	0.778	2	Dendritic cell 1
GBP1	7.46e-25	1.5e-20	-0.354116	0.52	0.559	2	Dendritic cell 1
PARP8	6.63e-23	1.33e-18	-0.26893	0.208	0.309	2	Dendritic cell 1
IQGAP2	6.01e-22	1.21e-17	-0.274448	0.429	0.495	2	Dendritic cell 1
RAD21	7.54e-22	1.52e-17	-0.256784	0.541	0.588	2	Dendritic cell 1
RABAC1	2.78e-21	5.6e-17	-0.279628	0.506	0.571	2	Dendritic cell 1
LTB	1.28e-20	2.59e-16	-0.906894	0.487	0.315	2	Dendritic cell 1
PPDPF	4.36e-20	8.79e-16	-0.258699	0.714	0.711	2	Dendritic cell 1
RBL2	4.84e-19	9.76e-15	-0.295607	0.283	0.371	2	Dendritic cell 1
CMC1	5.72e-19	1.15e-14	-0.470701	0.317	0.404	2	Dendritic cell 1
ZBTB38	1.01e-18	2.02e-14	-0.257271	0.319	0.404	2	Dendritic cell 1
SLC2A3	3.05e-18	6.14e-14	-0.258971	0.408	0.487	2	Dendritic cell 1
ITGB1	1.49e-17	2.99e-13	-0.299496	0.811	0.771	2	Dendritic cell 1
DST	1.09e-14	2.19e-10	-0.28147	0.49	0.5	2	Dendritic cell 1
CTSZ	1.43e-12	2.89e-08	-0.252898	0.966	0.755	2	Dendritic cell 1
BTG1	4.77e-12	9.6e-08	-0.404548	0.932	0.891	2	Dendritic cell 1
2020-09-07	2.52e-11	5.07e-07	-0.252715	0.912	0.881	2	Dendritic cell 1
NFKBIA	9.53e-11	1.92e-06	-0.286639	0.48	0.507	2	Dendritic cell 1
DUSP1	3.07e-07	0.00617488	-0.308506	0.767	0.668	2	Dendritic cell 1
NAMPT	5.41e-07	0.01089	-0.304607	0.756	0.667	2	Dendritic cell 1
HMGB2	6.03e-06	0.121536	-0.357756	0.398	0.409	2	Dendritic cell 1
NCF1	7.04e-06	0.1418	-0.351379	0.575	0.545	2	Dendritic cell 1
EVL	1.18e-05	0.236862	-0.27451	0.541	0.537	2	Dendritic cell 1
APOBEC3G	2.5e-05	0.502846	-0.346739	0.375	0.395	2	Dendritic cell 1
LGMN	0	0	1.52232	0.978	0.377	3	Macrophage 3
DAB2	0	0	1.41722	0.998	0.545	3	Macrophage 3
CTSL	0	0	1.37634	0.997	0.615	3	Macrophage 3
CTSB	0	0	1.28394	1	0.741	3	Macrophage 3
CTSD	0	0	1.27001	0.995	0.634	3	Macrophage 3
RNASE1	0	0	1.2497	0.984	0.461	3	Macrophage 3
GPNMB	0	0	1.17905	0.929	0.267	3	Macrophage 3
APOE	0	0	1.17794	0.533	0.144	3	Macrophage 3
HMOX1	0	0	1.15404	0.977	0.568	3	Macrophage 3
GLUL	0	0	1.12237	0.999	0.653	3	Macrophage 3
FABP5	0	0	1.11621	0.984	0.656	3	Macrophage 3
FTL	0	0	1.10418	1	0.998	3	Macrophage 3
APOC1	0	0	1.08779	0.622	0.238	3	Macrophage 3
SEPP1	0	0	0.931627	0.529	0.156	3	Macrophage 3
CD68	0	0	0.902837	0.995	0.664	3	Macrophage 3
C1QB	0	0	0.901322	0.918	0.459	3	Macrophage 3
CCL2	0	0	0.882541	0.589	0.191	3	Macrophage 3
MPP1	0	0	0.879965	0.948	0.43	3	Macrophage 3
LYVE1	0	0	0.879639	0.913	0.381	3	Macrophage 3
STAB1	0	0	0.873696	0.952	0.42	3	Macrophage 3
PLIN2	0	0	0.870624	0.912	0.52	3	Macrophage 3
CALM3	0	0	0.87049	0.986	0.708	3	Macrophage 3
TTYH3	0	0	0.869496	0.951	0.435	3	Macrophage 3
C1QA	0	0	0.867908	0.954	0.506	3	Macrophage 3
C1QC	0	0	0.861479	0.9	0.372	3	Macrophage 3
LIPA	0	0	0.85614	0.984	0.622	3	Macrophage 3
CTSZ	0	0	0.854047	0.999	0.752	3	Macrophage 3
BLVRB	0	0	0.85348	0.978	0.656	3	Macrophage 3
ABCA1	0	0	0.852805	0.842	0.229	3	Macrophage 3
NRP1	0	0	0.845574	0.916	0.305	3	Macrophage 3
PSAP	0	0	0.835646	1	0.807	3	Macrophage 3
NPL	0	0	0.831405	0.951	0.402	3	Macrophage 3
MAF	0	0	0.826238	0.98	0.535	3	Macrophage 3
CREG1	0	0	0.813129	0.96	0.489	3	Macrophage 3
COLEC12	0	0	0.798152	0.812	0.234	3	Macrophage 3
BRI3	0	0	0.78995	0.997	0.792	3	Macrophage 3
MARCO	0	0	0.78573	0.947	0.537	3	Macrophage 3
ASAH1	0	0	0.777242	0.948	0.549	3	Macrophage 3
PLTP	0	0	0.767016	0.738	0.198	3	Macrophage 3
FCGRT	0	0	0.740307	0.992	0.726	3	Macrophage 3
SLC40A1	0	0	0.731745	0.489	0.109	3	Macrophage 3
ANXA4	0	0	0.728331	0.943	0.544	3	Macrophage 3
CD163	0	0	0.712004	0.99	0.56	3	Macrophage 3
SLC7A8	0	0	0.701455	0.813	0.205	3	Macrophage 3
IDH1	0	0	0.700217	0.864	0.399	3	Macrophage 3
CYFIP1	0	0	0.696219	0.946	0.527	3	Macrophage 3
EMP1	0	0	0.695817	0.83	0.319	3	Macrophage 3
ADAP2	0	0	0.692394	0.99	0.594	3	Macrophage 3
SCARB2	0	0	0.691614	0.934	0.487	3	Macrophage 3
LAMP1	0	0	0.690636	0.955	0.539	3	Macrophage 3
LHFPL2	0	0	0.68604	0.791	0.261	3	Macrophage 3
UCP2	0	0	0.682294	0.981	0.714	3	Macrophage 3
SLCO2B1	0	0	0.681136	0.844	0.279	3	Macrophage 3
SDC3	0	0	0.675998	0.793	0.278	3	Macrophage 3
SDCBP	0	0	0.674325	0.994	0.747	3	Macrophage 3
SIGLEC1	0	0	0.673806	0.921	0.357	3	Macrophage 3
CLTC	0	0	0.67121	0.988	0.697	3	Macrophage 3
CSTB	0	0	0.668132	0.995	0.862	3	Macrophage 3
PRDX1	0	0	0.660541	0.99	0.798	3	Macrophage 3
ME2	0	0	0.659147	0.925	0.521	3	Macrophage 3
RAP2B	0	0	0.658988	0.969	0.624	3	Macrophage 3
FAM20C	0	0	0.658671	0.834	0.334	3	Macrophage 3
AP2A2	0	0	0.658355	0.892	0.418	3	Macrophage 3
BCAT1	0	0	0.651755	0.813	0.312	3	Macrophage 3
CALR	0	0	0.649952	0.992	0.802	3	Macrophage 3
FOLR2	0	0	0.649381	0.839	0.349	3	Macrophage 3
MSR1	0	0	0.641727	0.97	0.586	3	Macrophage 3
TUBB	0	0	0.639933	0.989	0.724	3	Macrophage 3
LILRB5	0	0	0.631844	0.74	0.219	3	Macrophage 3
NRP2	0	0	0.625917	0.768	0.227	3	Macrophage 3
RGL1	0	0	0.623949	0.838	0.333	3	Macrophage 3
GNPDA1	0	0	0.622344	0.863	0.401	3	Macrophage 3
MFSD1	0	0	0.621988	0.957	0.586	3	Macrophage 3
ALDH1A1	0	0	0.613396	0.659	0.23	3	Macrophage 3
TREM2	0	0	0.612179	0.821	0.336	3	Macrophage 3
MS4A4A	0	0	0.606665	0.857	0.459	3	Macrophage 3
DRAM1	0	0	0.605595	0.913	0.45	3	Macrophage 3
AP1B1	0	0	0.601664	0.889	0.436	3	Macrophage 3
ITSN1	0	0	0.597041	0.753	0.241	3	Macrophage 3
CD28	0	0	0.587088	0.667	0.183	3	Macrophage 3
CLTA	0	0	0.585951	0.987	0.794	3	Macrophage 3
TSPAN4	0	0	0.583597	0.81	0.348	3	Macrophage 3
BMP2K	0	0	0.582761	0.934	0.532	3	Macrophage 3
FPR3	0	0	0.570605	0.949	0.574	3	Macrophage 3
LGALS9	0	0	0.566581	0.946	0.611	3	Macrophage 3
MCOLN1	0	0	0.564887	0.815	0.371	3	Macrophage 3
MGLL	0	0	0.562498	0.739	0.212	3	Macrophage 3
ARHGAP18	0	0	0.558301	0.974	0.652	3	Macrophage 3
TUBA1C	0	0	0.555406	0.911	0.486	3	Macrophage 3
LRP1	0	0	0.552781	0.948	0.564	3	Macrophage 3
ATP6V1B2	0	0	0.546438	0.885	0.49	3	Macrophage 3
ADAM9	0	0	0.541142	0.844	0.381	3	Macrophage 3
GPR34	0	0	0.534438	0.721	0.27	3	Macrophage 3
MRC1	0	0	0.533926	0.899	0.424	3	Macrophage 3
H2AFY	0	0	0.533523	0.985	0.755	3	Macrophage 3
EHD4	0	0	0.525852	0.918	0.524	3	Macrophage 3
MTSS1	0	0	0.524596	0.813	0.318	3	Macrophage 3
HNMT	0	0	0.520899	0.951	0.595	3	Macrophage 3
GLMP	0	0	0.511401	0.769	0.295	3	Macrophage 3
CNDP2	0	0	0.507836	0.908	0.536	3	Macrophage 3
SNX24	0	0	0.503423	0.777	0.291	3	Macrophage 3
NINJ1	0	0	0.49336	0.772	0.335	3	Macrophage 3
ATP6V1A	0	0	0.48912	0.832	0.429	3	Macrophage 3
ITGB5	0	0	0.483472	0.749	0.329	3	Macrophage 3
CMKLR1	0	0	0.453856	0.736	0.276	3	Macrophage 3
FSCN1	0	0	0.447121	0.49	0.12	3	Macrophage 3
MT-ND2	0	0	0.438518	0.999	0.983	3	Macrophage 3
ACTB	0	0	0.435865	1	0.991	3	Macrophage 3
ABCC5	0	0	0.432377	0.689	0.271	3	Macrophage 3
ACP2	0	0	0.425029	0.728	0.282	3	Macrophage 3
RAB3IL1	0	0	0.419072	0.565	0.141	3	Macrophage 3
PLA2G15	0	0	0.418485	0.677	0.259	3	Macrophage 3
VAT1	0	0	0.41778	0.592	0.171	3	Macrophage 3
PLA2G7	0	0	0.415836	0.446	0.108	3	Macrophage 3
NR1H3	0	0	0.401016	0.565	0.157	3	Macrophage 3
TMEM37	0	0	0.394843	0.609	0.18	3	Macrophage 3
[truncated: 14,845 more rows]
